# Supplementary material
Source: PubMed Central journal article supplement (PMC3071539)
Supplement: NIHMS263653-supplement-1_si_001.pdf [file NIHMS263653-supplement-1_si_001.pdf]

**Coordination-Driven Self-Assembly of M<sub>3</sub>L<sub>2</sub> Trigonal Cages from  
Pre-organized Metalloligands Incorporating Octahedral Metal Centers and  
Fluorescent Detection of Nitroaromatics**

*Ming Wang,<sup>†</sup> Vaishali Vajpayee,<sup>‡</sup> Sankarasekaran Shanmugaraju,<sup>§</sup> Yao-Rong Zheng,<sup>†</sup>  
Zhigang Zhao,<sup>†</sup> Hyunuk Kim,<sup>⊥</sup> Partha Sarathi Mukherjee,<sup>\*§</sup>*

*Ki-Whan Chi<sup>\*‡</sup> and Peter J. Stang<sup>\*†</sup>*

<sup>†</sup> *Department of Chemistry, University of Utah, 315 South 1400 East Salt Lake City, Utah  
84112* <sup>‡</sup> *Department of Chemistry, University of Ulsan, Ulsan 680-749 Republic of Korea*

<sup>§</sup> *Inorganic and Physical Chemistry Department, Indian Institute of Science,  
Bangalore-560012, India*

<sup>⊥</sup> *Department of Chemistry, POSTECH, Pohang, 690-784, Republic of Korea*

Email: [stang@chem.utah.edu](mailto:stang@chem.utah.edu)

|                                                                                                              |    |
|--------------------------------------------------------------------------------------------------------------|----|
| 1. <sup>31</sup> P{ <sup>1</sup> H} NMR of trigonal-bipyramidal cage <b>6 - 8</b> .....                      | S2 |
| 2. <sup>1</sup> H NMR of trigonal-bipyramidal cage <b>6</b> .....                                            | S2 |
| 3. <sup>1</sup> H NMR of trigonal-bipyramidal cage <b>7</b> .....                                            | S3 |
| 4. <sup>1</sup> H NMR of trigonal-bipyramidal cage <b>8</b> .....                                            | S3 |
| 5. Theoretical and experimental of ESI-MS results for trigonal-bipyramidal cages <b>7</b> and <b>8</b> ..... | S4 |
| 6. <sup>1</sup> H NMR of trigonal prismatic cages <b>12</b> and <b>13</b> .....                              | S5 |
| 7. The stiochiometry plot of TNT/ Cage <b>12</b> .....                                                       | S6 |
| 8. The binding constant of TNT/Cage 12 .....                                                                 | S6 |
| 9. Spectral and photophysical data of <b>12</b> and <b>13</b> in methanol .....                              | S7 |

10. Crystal data and structure refinement parameters for **12** .....S8

11. Crystallographic file (in CIF format) of **12** .....S9

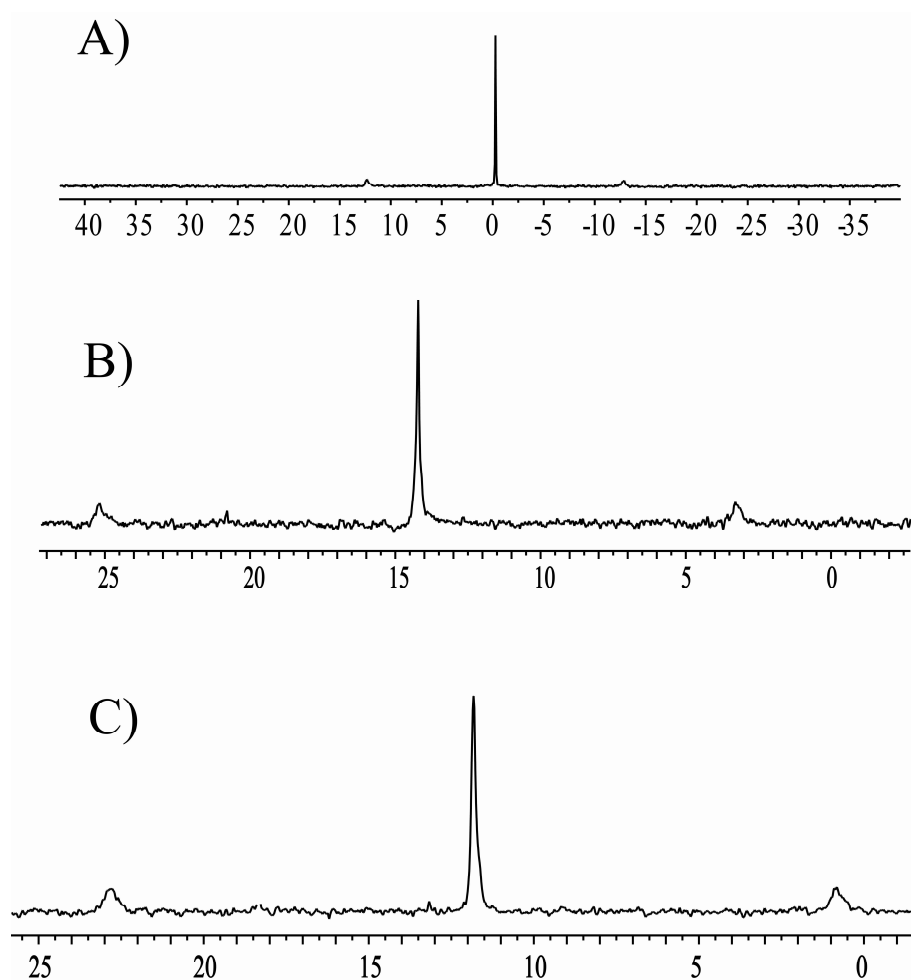

**Figure S1.**  $^{31}\text{P}\{^1\text{H}\}$  NMR of trigonal-bipyramidal cages **6** – **8**: A) cage **6** in  $\text{CD}_2\text{Cl}_2/\text{CD}_3\text{NO}_2$  (v:v = 2:1); B) cage **7** in acetone- $d_6/\text{D}_2\text{O}$  (v:v = 1:1); C) cage **8** in acetone- $d_6/\text{D}_2\text{O}$  (v:v = 1:1).

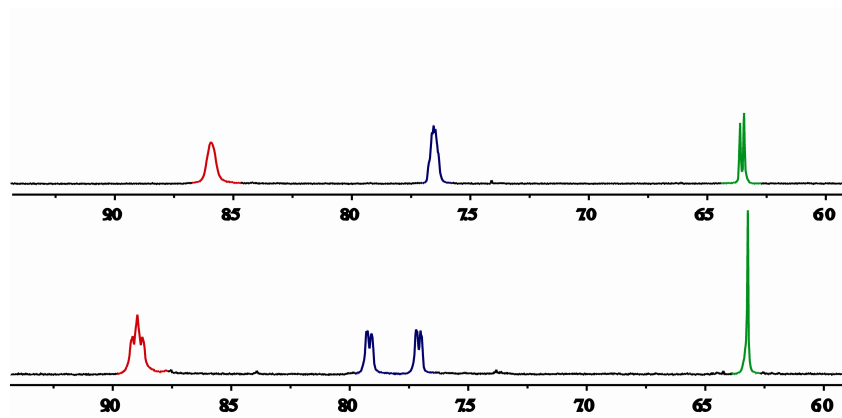

**Figure S2.** Partial  $^1\text{H}$  NMR (300 MHz, 298 K) of donor **2** (*top*) and trigonal bipyramid **6** (*bottom*) in  $\text{CD}_2\text{Cl}_2/\text{CD}_3\text{NO}_2$  (v:v = 2:1).

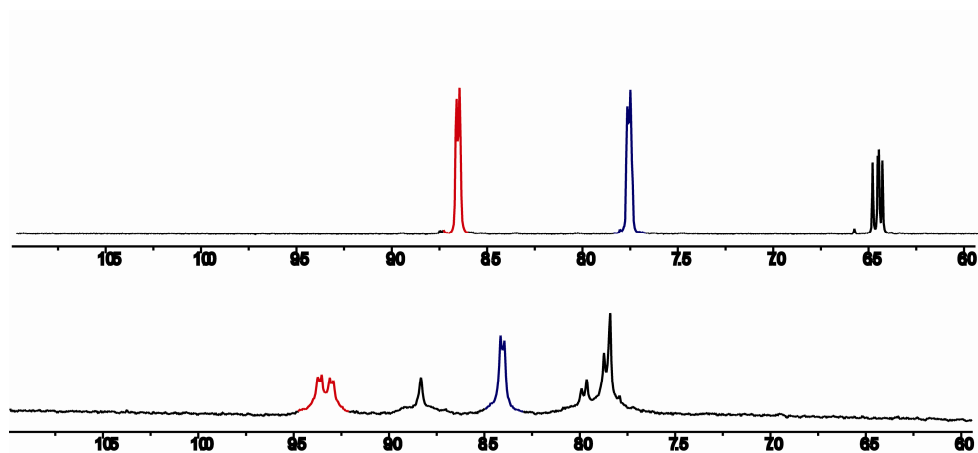

**Figure S3.** Partial  $^1\text{H}$  NMR (300 MHz, 298 K) of donor **1** (*top*) and trigonal-bipyramidal cage **7** (*bottom*) in acetone- $d_6$ / $\text{D}_2\text{O}$  (v:v = 1:1).

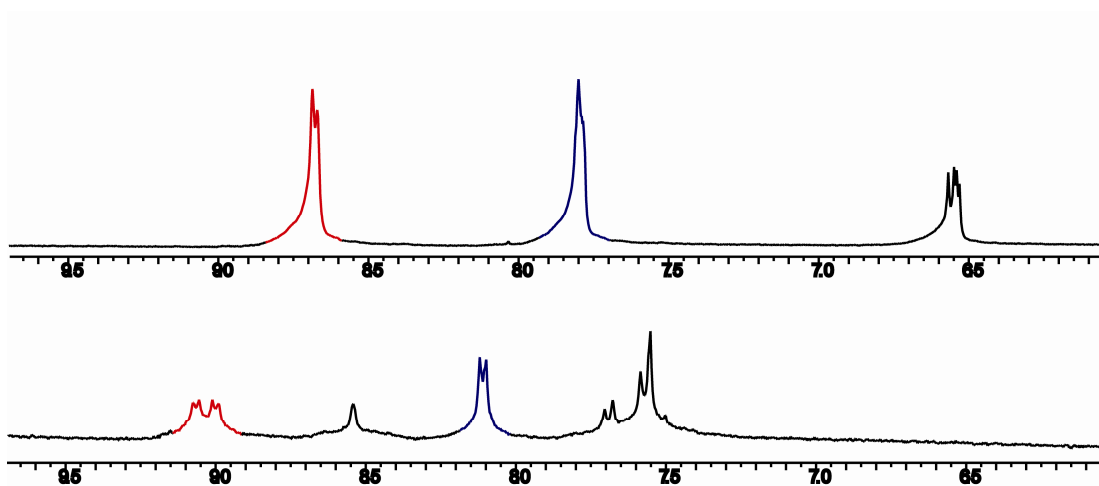

**Figure S4.** Partial  $^1\text{H}$  NMR (300 MHz, 298 K) of donor **2** (*top*) and trigonal-bipyramid cage **8** (*bottom*) in acetone- $d_6$ / $\text{D}_2\text{O}$  (v:v = 1:1).

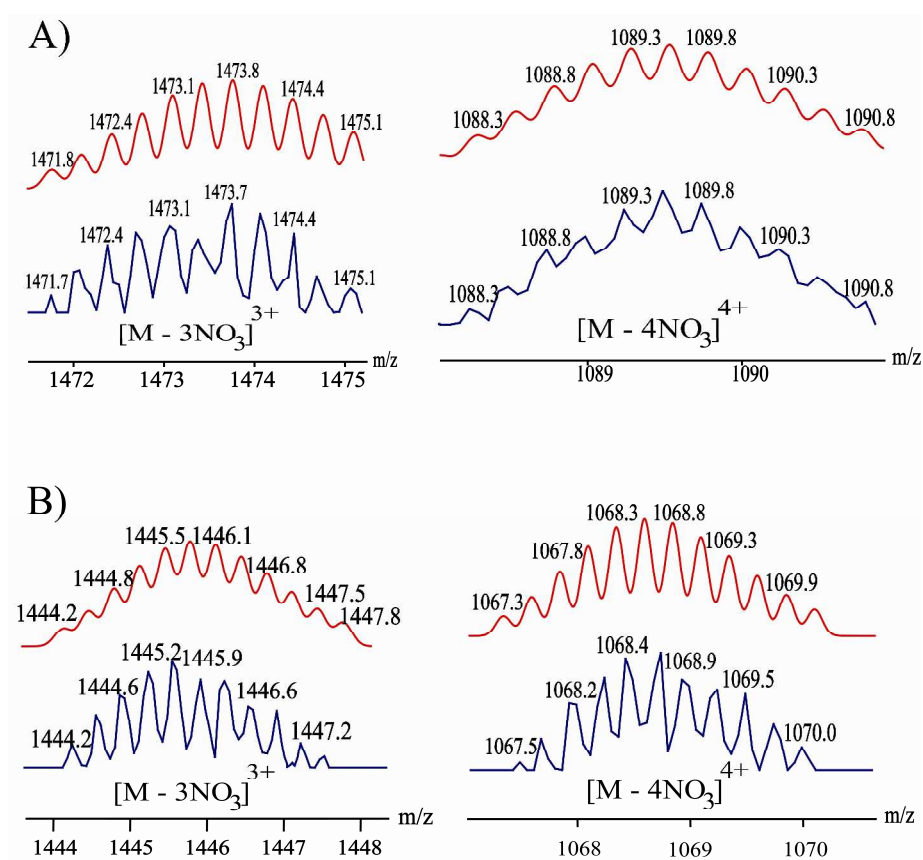

**Figure S5.** Calculated (red) and experimental (blue) ESI mass spectra of trigonal-bipyramidal cages **7** (A) and **8** (B).

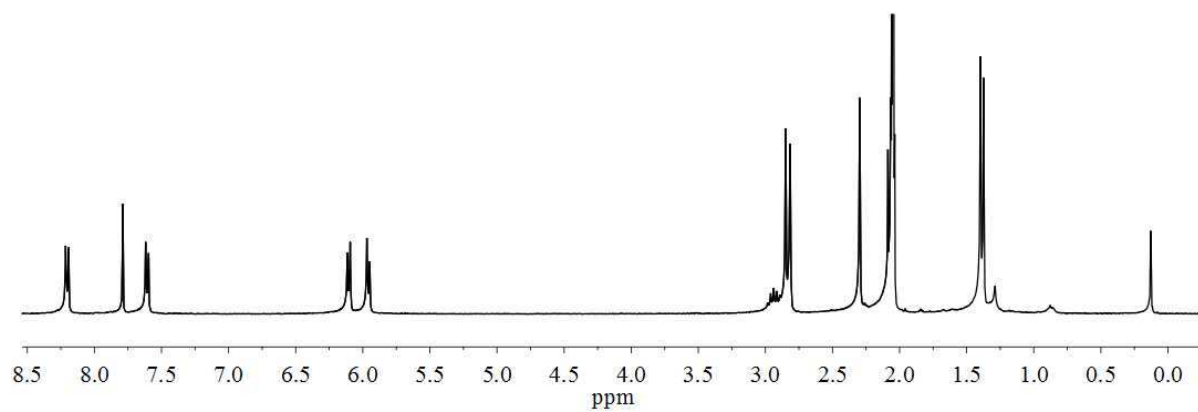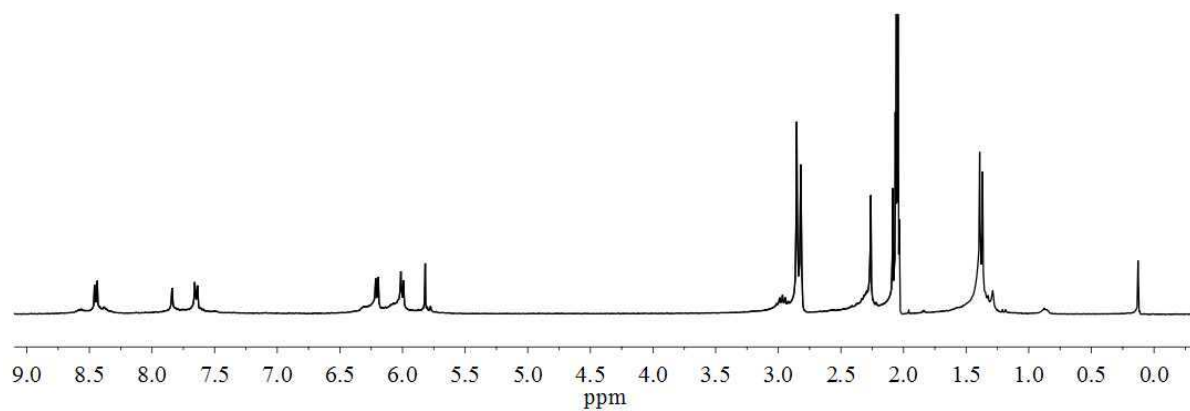

**Figure S6.** <sup>1</sup>H NMR (500 MHz) of trigonal prismatic cages **12** (*top*) and **13** (*bottom*). <sup>1</sup>H NMR were recorded in acetone-*d*<sub>6</sub>.

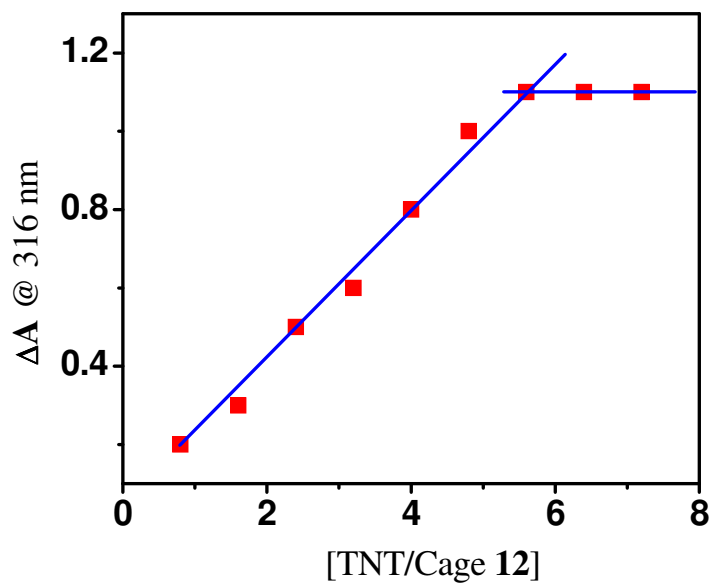

**Figure S7.** The stoichiometry plot of TNT/Cage 12

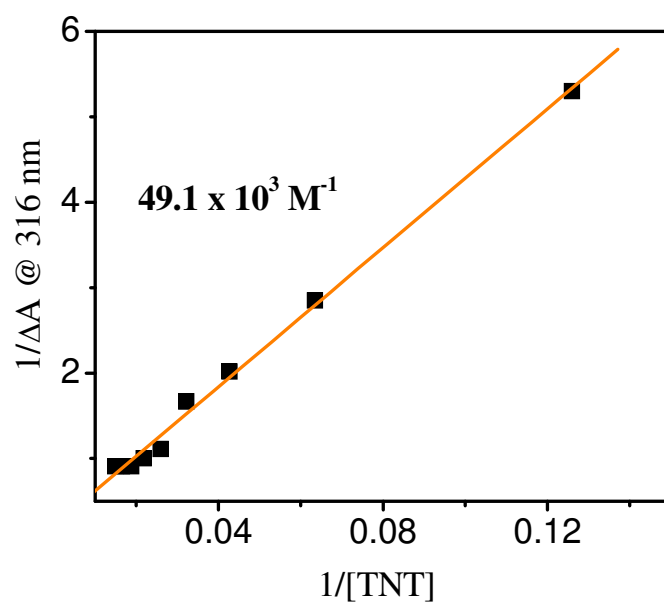

**Figure S8.** The binding constant of TNT/Cage 12.

**Table S1.** Crystal data and structure refinement for **12**.

|                                   |                                                      |                              |
|-----------------------------------|------------------------------------------------------|------------------------------|
| Empirical formula                 | $C_{120.79}H_{121.37}Cl_{5.02}N_{6.79}O_{36.16}Ru_6$ |                              |
| Formula weight                    | 3031.10                                              |                              |
| Temperature                       | 100(2) K                                             |                              |
| Wavelength                        | 0.90000 Å                                            |                              |
| Crystal system                    | Triclinic                                            |                              |
| Space group                       | P-1                                                  |                              |
| Unit cell dimensions              | $a = 13.181(3)$ Å                                    | $\alpha = 107.76(3)^\circ$ . |
|                                   | $b = 23.307(5)$ Å                                    | $\beta = 102.02(3)^\circ$ .  |
|                                   | $c = 25.698(5)$ Å                                    | $\gamma = 98.37(3)^\circ$ .  |
| Volume                            | 7166(2) Å <sup>3</sup>                               |                              |
| Z                                 | 2                                                    |                              |
| Density (calculated)              | 1.405 mg/m <sup>3</sup>                              |                              |
| Absorption coefficient            | 1.462 mm <sup>-1</sup>                               |                              |
| F(000)                            | 3065                                                 |                              |
| Crystal size                      | 0.24 x 0.07 x 0.07 mm <sup>3</sup>                   |                              |
| Theta range for data collection   | 2.05 to 29.74°.                                      |                              |
| Index ranges                      | -11 ≤ h ≤ 11, -25 ≤ k ≤ 25, -25 ≤ l ≤ 25             |                              |
| Reflections collected             | 20268                                                |                              |
| Independent reflections           | 11062 [R(int) = 0.0553]                              |                              |
| Completeness to theta = 25.00°    | 81.7 %                                               |                              |
| Absorption correction             | Semi-empirical from equivalents                      |                              |
| Max. and min. transmission        | 0.9046 and 0.7205                                    |                              |
| Refinement method                 | Full-matrix least-squares on F <sup>2</sup>          |                              |
| Data / restraints / parameters    | 11062 / 1254 / 1738                                  |                              |
| Goodness-of-fit on F <sup>2</sup> | 1.163                                                |                              |
| Final R indices [I > 2σ(I)]       | R1 = 0.0904, wR2 = 0.2681                            |                              |
| R indices (all data)              | R1 = 0.1085, wR2 = 0.2847                            |                              |
| Largest diff. peak and hole       | 1.102 and -0.841 e.Å <sup>-3</sup>                   |                              |

**Table S2.** Spectral and Photophysical Data of **12** and **13** in Methanol

| M <sub>3</sub> L <sub>2</sub> Cages | Absorption maxima<br>$\lambda_{\max}$ (nm) | Molar extinction co-efficient<br>$\epsilon \times 10^3 \text{ M}^{-1} \text{ cm}^{-1}$<br>[ $\lambda_{\max}$ (nm)] | Fluorescence emission maxima<br>$\lambda_{\max}$ (nm) | Quantum Yield ( $\Phi$ ) at 298 K |
|-------------------------------------|--------------------------------------------|--------------------------------------------------------------------------------------------------------------------|-------------------------------------------------------|-----------------------------------|
| <b>12</b>                           | 310, 502 (sh)                              | 220 (310)                                                                                                          | 349, 361, 380                                         | 0.12                              |
| <b>13</b>                           | 315                                        | 240 (315)                                                                                                          | 349, 361, 380                                         | 0.22                              |

**Determination of quantum yields of M<sub>3</sub>L<sub>2</sub> cages 12 and 13.**

Fluorescence quantum yields of both the cages **12** and **13** were determined in the reference of anthracene ( $\Phi = 0.27$ ) in ethanol at 298 K.

The quantum yields are calculated according to the following equation

$$\Phi_{\text{unk}} = \Phi_{\text{std}} * (I_{\text{unk}}/A_{\text{unk}}) * (I_{\text{std}}/A_{\text{std}}) * (\eta_{\text{unk}}/\eta_{\text{std}})^2$$

Where,  $\Phi$  is the quantum yield,  $I_{\text{unk}}$  and  $I_{\text{std}}$  is the integrated emission intensity of cages **12** or **13** and standard respectively,  $A_{\text{unk}}$  and  $A_{\text{std}}$  is the absorbance of the cages **12** or **13** and standard respectively,  $\eta$  is the refractive index of the solvent (ethanol).



**Table S3.** Atomic coordinates ( $\times 10^4$ ) and equivalent isotropic displacement parameters ( $\text{\AA}^2 \times 10^3$ ) for **12**.  $U(\text{eq})$  is defined as one third of the trace of the orthogonalized  $U_{ij}$  tensor.

|       | x         | y       | z        | U(eq)  |
|-------|-----------|---------|----------|--------|
| Ru(1) | 10969(1)  | 9635(1) | 3382(1)  | 106(1) |
| Ru(2) | 7312(1)   | 3580(1) | -3943(1) | 110(1) |
| Ru(3) | 10776(1)  | 2145(1) | 2362(1)  | 119(1) |
| Ru(4) | 3148(1)   | 2759(1) | -4062(1) | 118(1) |
| Ru(5) | 7330(1)   | 2894(1) | 2981(1)  | 126(1) |
| Ru(6) | 6992(1)   | 9816(1) | 2344(1)  | 123(1) |
| O(1)  | 5870(9)   | 3849(4) | -4053(4) | 113(3) |
| O(2)  | 6307(10)  | 2803(4) | -3938(4) | 109(3) |
| O(3)  | 4102(10)  | 3478(4) | -4185(4) | 117(3) |
| O(4)  | 4585(8)   | 2475(4) | -3998(4) | 110(3) |
| O(5)  | 9119(9)   | 1816(4) | 2172(5)  | 119(3) |
| O(6)  | 10441(11) | 2812(5) | 3008(5)  | 125(3) |
| O(7)  | 8958(9)   | 3162(4) | 3210(4)  | 118(3) |
| O(8)  | 7669(10)  | 2153(4) | 2410(4)  | 111(3) |
| O(9)  | 9370(8)   | 9451(4) | 3411(4)  | 105(3) |
| O(10) | 10209(10) | 9954(4) | 2746(4)  | 111(3) |
| O(11) | 7751(10)  | 9528(4) | 2992(4)  | 113(3) |
| O(12) | 8557(9)   | 9999(4) | 2303(5)  | 118(3) |
| N(1)  | 10513(11) | 8782(5) | 2693(5)  | 110(4) |
| N(2)  | 7399(10)  | 3895(5) | -3060(5) | 108(3) |
| N(3)  | 10403(12) | 2714(5) | 1906(6)  | 119(4) |
| N(4)  | 3848(11)  | 3301(5) | -3208(5) | 120(4) |
| N(5)  | 6921(12)  | 8902(6) | 1841(6)  | 132(5) |
| N(6)  | 7395(10)  | 3330(5) | 2394(6)  | 122(4) |
| C(1)  | 10921(14) | 8718(6) | 2253(8)  | 122(5) |
| C(2)  | 9949(16)  | 8285(6) | 2713(8)  | 150(7) |
| C(3)  | 10671(15) | 8146(7) | 1800(7)  | 136(6) |
| C(4)  | 9672(19)  | 7741(7) | 2292(8)  | 167(8) |
| C(5)  | 10031(14) | 7642(6) | 1829(7)  | 117(5) |
| C(6)  | 9767(13)  | 7050(6) | 1398(6)  | 118(5) |
| C(7)  | 9511(14)  | 6498(5) | 1028(6)  | 126(5) |
| C(8)  | 9292(13)  | 5898(6) | 713(6)   | 113(5) |
| C(9)  | 8885(12)  | 5692(6) | 150(6)   | 104(4) |

|       |           |         |          |        |
|-------|-----------|---------|----------|--------|
| C(10) | 8619(12)  | 5064(6) | -190(6)  | 108(4) |
| C(11) | 8789(11)  | 4641(6) | 79(6)    | 98(4)  |
| C(12) | 9198(12)  | 4839(6) | 655(6)   | 101(4) |
| C(13) | 9422(12)  | 5453(6) | 970(6)   | 107(4) |
| C(14) | 8266(12)  | 4838(6) | -784(7)  | 99(4)  |
| C(15) | 7962(11)  | 4611(6) | -1296(7) | 98(4)  |
| C(16) | 7718(11)  | 4352(6) | -1913(6) | 98(4)  |
| C(17) | 7305(11)  | 4673(6) | -2238(6) | 103(4) |
| C(18) | 7897(14)  | 3784(6) | -2165(7) | 124(5) |
| C(19) | 7130(12)  | 4436(6) | -2818(7) | 106(4) |
| C(20) | 7748(14)  | 3575(6) | -2746(7) | 125(5) |
| C(22) | 9397(12)  | 4378(6) | 928(6)   | 108(4) |
| C(23) | 9562(13)  | 3998(6) | 1123(6)  | 112(5) |
| C(24) | 9878(14)  | 3574(6) | 1401(7)  | 118(5) |
| C(25) | 9241(13)  | 2971(7) | 1180(7)  | 122(5) |
| C(26) | 10701(14) | 3737(7) | 1861(7)  | 124(5) |
| C(27) | 11009(15) | 3297(7) | 2106(8)  | 140(6) |
| C(28) | 9537(15)  | 2561(6) | 1451(8)  | 124(5) |
| C(29) | 3763(12)  | 3907(6) | -3038(6) | 106(4) |
| C(30) | 4424(13)  | 3041(7) | -2847(7) | 113(4) |
| C(31) | 4201(13)  | 4242(7) | -2486(7) | 121(5) |
| C(32) | 4844(13)  | 3377(7) | -2288(7) | 121(5) |
| C(33) | 4792(13)  | 4019(7) | -2070(7) | 116(4) |
| C(34) | 5214(16)  | 4375(7) | -1490(8) | 130(6) |
| C(35) | 5608(14)  | 4637(7) | -1002(8) | 118(5) |
| C(36) | 5979(11)  | 4947(7) | -406(7)  | 106(4) |
| C(37) | 6157(13)  | 5586(7) | -175(7)  | 121(5) |
| C(38) | 6509(13)  | 5883(7) | 426(7)   | 123(5) |
| C(39) | 6750(12)  | 5521(7) | 742(7)   | 117(5) |
| C(40) | 6601(14)  | 4901(7) | 517(7)   | 120(5) |
| C(41) | 6659(14)  | 6506(6) | 657(6)   | 121(5) |
| C(42) | 6747(15)  | 7090(7) | 908(7)   | 131(5) |
| C(43) | 6836(16)  | 7689(7) | 1226(9)  | 134(5) |
| C(44) | 6421(17)  | 7810(8) | 1676(8)  | 155(7) |
| C(45) | 7325(13)  | 8181(7) | 1092(7)  | 122(5) |
| C(46) | 7338(16)  | 8768(8) | 1419(8)  | 138(6) |
| C(47) | 6792(14)  | 4546(7) | 895(7)   | 129(5) |
| C(48) | 6961(16)  | 4257(8) | 1200(8)  | 141(6) |

|       |           |         |           |         |
|-------|-----------|---------|-----------|---------|
| C(49) | 7124(12)  | 3950(7) | 1592(7)   | 122(5)  |
| C(50) | 7589(12)  | 4246(8) | 2175(8)   | 132(5)  |
| C(51) | 6798(12)  | 3298(7) | 1423(7)   | 120(5)  |
| C(52) | 7716(12)  | 3935(7) | 2528(7)   | 130(6)  |
| C(53) | 6966(13)  | 3012(8) | 1819(8)   | 134(6)  |
| C(54) | 11060(14) | 1236(7) | 1982(8)   | 124(5)  |
| C(55) | 11149(14) | 1337(7) | 2559(8)   | 125(5)  |
| C(56) | 11663(14) | 1674(7) | 1804(8)   | 127(5)  |
| C(57) | 12345(14) | 2210(8) | 2217(8)   | 128(5)  |
| C(58) | 11839(13) | 1888(7) | 2956(8)   | 120(5)  |
| C(59) | 12418(14) | 2347(8) | 2818(8)   | 129(5)  |
| C(60) | 10255(16) | 675(7)  | 1557(8)   | 137(5)  |
| C(61) | 9798(16)  | 695(8)  | 969(8)    | 150(6)  |
| C(62) | 2165(14)  | 1947(8) | -4075(9)  | 137(5)  |
| C(63) | 2246(15)  | 1867(7) | -4642(8)  | 137(5)  |
| C(64) | 2083(11)  | 2272(6) | -4905(7)  | 113(4)  |
| C(65) | 1733(16)  | 2441(7) | -3849(8)  | 144(6)  |
| C(66) | 1527(15)  | 2896(8) | -4114(8)  | 136(5)  |
| C(67) | 1755(16)  | 2798(7) | -4656(8)  | 139(5)  |
| C(68) | 1672(17)  | 3323(8) | -4931(8)  | 143(5)  |
| C(69) | 510(18)   | 3347(9) | -5119(9)  | 169(7)  |
| C(70) | 9766(18)  | 5232(8) | -3861(12) | 198(10) |
| C(71) | 7455(14)  | 3364(7) | -4820(7)  | 128(5)  |
| C(72) | 7976(13)  | 2986(6) | -4559(7)  | 107(4)  |
| C(73) | 8779(14)  | 3273(7) | -4019(7)  | 126(5)  |
| C(74) | 9072(15)  | 3911(7) | -3746(7)  | 131(5)  |
| C(75) | 8575(15)  | 4309(7) | -3976(7)  | 127(5)  |
| C(76) | 7708(14)  | 4010(6) | -4526(7)  | 126(5)  |
| C(77) | 7691(16)  | 2309(6) | -4829(7)  | 141(6)  |
| C(78) | 8884(16)  | 4998(7) | -3682(9)  | 148(6)  |
| C(79) | 7963(16)  | 5329(8) | -3809(9)  | 164(7)  |
| C(80) | 8633(17)  | 2187(7) | 2460(7)   | 107(4)  |
| C(81) | 7220(20)  | 3419(8) | 3794(8)   | 156(7)  |
| C(82) | 6439(18)  | 3494(9) | 3374(9)   | 151(6)  |
| C(83) | 5885(17)  | 2400(8) | 2990(9)   | 138(5)  |
| C(84) | 6638(15)  | 2330(7) | 3398(8)   | 130(5)  |
| C(85) | 7234(15)  | 2834(7) | 3756(9)   | 139(5)  |
| C(86) | 5715(16)  | 2957(8) | 2949(9)   | 145(6)  |

|        |           |           |          |         |
|--------|-----------|-----------|----------|---------|
| C(87)  | 5233(15)  | 1747(8)   | 2456(8)  | 139(5)  |
| C(88)  | 4639(16)  | 1888(10)  | 1912(9)  | 175(8)  |
| C(89)  | 4411(13)  | 1368(8)   | 2648(8)  | 140(6)  |
| C(90)  | 9501(18)  | 2777(7)   | 2968(8)  | 116(5)  |
| C(91)  | 10725(19) | 81(8)     | 1482(9)  | 179(8)  |
| C(92)  | 13082(14) | 2945(7)   | 3257(8)  | 143(6)  |
| C(93)  | 6233(13)  | 4595(7)   | -62(7)   | 118(5)  |
| C(94)  | 6427(15)  | 8435(7)   | 1983(8)  | 144(6)  |
| C(95)  | 12104(11) | 9374(6)   | 3949(7)  | 105(4)  |
| C(96)  | 11564(14) | 9746(7)   | 4268(7)  | 123(5)  |
| C(97)  | 11512(13) | 10311(6)  | 4219(6)  | 108(4)  |
| C(98)  | 11995(13) | 10533(6)  | 3880(6)  | 112(4)  |
| C(99)  | 12592(12) | 10168(6)  | 3527(7)  | 108(4)  |
| C(100) | 12670(13) | 9577(6)   | 3601(7)  | 116(4)  |
| C(101) | 13041(13) | 10388(7)  | 3134(7)  | 120(5)  |
| C(102) | 10921(15) | 9503(7)   | 4635(7)  | 131(5)  |
| C(103) | 10604(15) | 8805(7)   | 4484(9)  | 155(7)  |
| C(104) | 6825(13)  | 10647(7)  | 2208(8)  | 127(5)  |
| C(105) | 6167(16)  | 10196(7)  | 1759(8)  | 140(6)  |
| C(106) | 5350(14)  | 9765(7)   | 1888(8)  | 131(5)  |
| C(107) | 5440(18)  | 9808(10)  | 2421(10) | 156(6)  |
| C(108) | 6132(18)  | 10263(10) | 2877(9)  | 149(6)  |
| C(109) | 6853(17)  | 10715(9)  | 2790(9)  | 154(6)  |
| C(110) | 6181(19)  | 10259(11) | 3492(9)  | 191(7)  |
| C(111) | 5384(17)  | 2837(6)   | -4000(6) | 104(4)  |
| C(112) | 5056(16)  | 3448(7)   | -4092(6) | 105(4)  |
| C(113) | 2461(16)  | 1496(8)   | -3764(8) | 155(6)  |
| C(114) | 7150(20)  | 10337(10) | 1070(10) | 188(8)  |
| C(115) | 8763(17)  | 9603(6)   | 3072(7)  | 112(5)  |
| C(116) | 9181(18)  | 9886(7)   | 2662(7)  | 118(5)  |
| C(117) | 6145(19)  | 10095(8)  | 1130(9)  | 156(6)  |
| C(118) | 5220(20)  | 10424(12) | 904(11)  | 222(10) |
| C(119) | 11670(17) | 9771(10)  | 5265(8)  | 168(6)  |
| C(120) | 2250(16)  | 3241(8)   | -5369(8) | 151(6)  |
| C(121) | 8035(17)  | 3997(8)   | 4184(8)  | 169(7)  |
| Cl(1)  | -441(4)   | 1518(2)   | -6153(2) | 113(1)  |
| O(1S)  | -854(8)   | 879(4)    | -6349(4) | 127(3)  |
| O(2S)  | -498(10)  | 1759(6)   | -5580(5) | 171(5)  |

|        |           |          |           |         |
|--------|-----------|----------|-----------|---------|
| O(3S)  | -1018(10) | 1805(6)  | -6480(6)  | 184(5)  |
| O(4S)  | 655(8)    | 1656(5)  | -6135(4)  | 129(4)  |
| Cl(2)  | 5783(5)   | 5948(2)  | -2365(3)  | 142(2)  |
| O(5S)  | 6007(12)  | 6613(4)  | -2134(6)  | 168(5)  |
| O(6S)  | 5894(10)  | 5710(5)  | -1911(5)  | 152(4)  |
| O(7S)  | 6523(9)   | 5772(5)  | -2685(5)  | 130(4)  |
| O(8S)  | 4724(9)   | 5741(6)  | -2710(6)  | 163(5)  |
| Cl(3)  | 1185(5)   | 3817(2)  | -2605(2)  | 130(2)  |
| O(9S)  | 527(18)   | 4187(10) | -2342(10) | 164(10) |
| O(9')  | 1880(20)  | 3413(12) | -2550(14) | 146(9)  |
| O(10S) | 1965(14)  | 3721(10) | -2188(8)  | 134(9)  |
| O(10') | 137(14)   | 3737(16) | -2561(13) | 154(10) |
| O(11S) | 1668(19)  | 4114(11) | -2929(9)  | 118(13) |
| O(11') | 1260(30)  | 4095(14) | -3020(11) | 116(11) |
| O(12S) | 516(15)   | 3230(6)  | -2979(7)  | 120(7)  |
| O(12') | 1810(20)  | 4273(10) | -2073(7)  | 143(8)  |
| Cl(4)  | 13807(5)  | 8227(2)  | 2669(2)   | 148(2)  |
| O(13S) | 14933(11) | 8374(12) | 2915(11)  | 175(10) |
| O(14S) | 13501(16) | 8679(7)  | 2453(8)   | 102(9)  |
| O(15S) | 13490(20) | 7628(6)  | 2262(7)   | 164(9)  |
| O(16S) | 13301(16) | 8218(9)  | 3123(7)   | 127(7)  |
| O(17S) | 12812(15) | 7829(12) | 2535(13)  | 192(12) |
| O(18S) | 14500(20) | 7916(11) | 2397(11)  | 160(9)  |
| O(19S) | 13650(30) | 8720(12) | 2452(15)  | 250(30) |
| O(20S) | 14260(30) | 8488(14) | 3259(7)   | 241(17) |
| Cl(5)  | 7170(20)  | 6983(14) | -708(14)  | 267(13) |
| O(21S) | 7660(40)  | 7200(20) | -1077(18) | 178(17) |
| O(22S) | 6060(20)  | 6930(13) | -786(12)  | 100(8)  |
| O(23S) | 7760(40)  | 6520(20) | -820(20)  | 187(18) |
| O(24S) | 7820(20)  | 7552(13) | -287(13)  | 112(10) |
| Cl(6)  | 6309(8)   | 1757(3)  | 268(3)    | 215(3)  |
| O(25S) | 5774(17)  | 1829(10) | 704(8)    | 268(10) |
| O(26S) | 6220(20)  | 2246(9)  | 56(11)    | 384(19) |
| O(27S) | 7391(13)  | 1762(13) | 486(12)   | 440(30) |
| O(28S) | 5820(14)  | 1181(7)  | -179(7)   | 212(7)  |
| N(1N)  | 7670(20)  | 9033(11) | -58(12)   | 177(8)  |
| O(1N)  | 7920(20)  | 9085(11) | -500(11)  | 225(9)  |
| O(2N)  | 8224(18)  | 9168(10) | 427(10)   | 192(7)  |

|        |           |          |          |         |
|--------|-----------|----------|----------|---------|
| C(1N)  | 6640(30)  | 8759(18) | -199(16) | 237(16) |
| O(1WA) | 6470(30)  | 5108(14) | 4453(16) | 138(10) |
| O(1WB) | 6020(30)  | 4810(20) | 4719(17) | 162(12) |
| O(1WC) | 5050(30)  | 4941(13) | 4040(13) | 120(9)  |
| O(2WA) | 9100(50)  | 7900(20) | 90(20)   | 203(16) |
| O(2WB) | 9690(40)  | 8180(20) | -280(20) | 198(14) |
| O(2WC) | 9810(50)  | 7530(30) | 60(20)   | 212(15) |
| O(3W)  | 12018(19) | 7890(9)  | 3521(9)  | 129(6)  |

---

Table 3. Bond lengths [ $\text{\AA}$ ] and angles [ $^\circ$ ] for p-1.

---

|              |           |
|--------------|-----------|
| Ru(1)-O(10)  | 2.122(9)  |
| Ru(1)-O(9)   | 2.111(10) |
| Ru(1)-N(1)   | 2.123(11) |
| Ru(1)-C(95)  | 2.153(14) |
| Ru(1)-C(97)  | 2.141(13) |
| Ru(1)-C(98)  | 2.162(14) |
| Ru(1)-C(96)  | 2.169(17) |
| Ru(1)-C(99)  | 2.207(15) |
| Ru(1)-C(100) | 2.230(16) |
| Ru(2)-O(1)   | 2.078(11) |
| Ru(2)-O(2)   | 2.086(9)  |
| Ru(2)-N(2)   | 2.133(12) |
| Ru(2)-C(76)  | 2.148(15) |
| Ru(2)-C(72)  | 2.187(14) |
| Ru(2)-C(73)  | 2.183(17) |
| Ru(2)-C(71)  | 2.210(17) |
| Ru(2)-C(75)  | 2.235(15) |
| Ru(2)-C(74)  | 2.233(18) |
| Ru(3)-N(3)   | 2.069(12) |
| Ru(3)-O(6)   | 2.073(12) |
| Ru(3)-O(5)   | 2.107(11) |
| Ru(3)-C(58)  | 2.135(15) |
| Ru(3)-C(55)  | 2.188(15) |
| Ru(3)-C(54)  | 2.167(15) |
| Ru(3)-C(57)  | 2.168(19) |
| Ru(3)-C(59)  | 2.142(18) |
| Ru(3)-C(56)  | 2.177(18) |
| Ru(4)-N(4)   | 2.095(12) |
| Ru(4)-O(4)   | 2.087(10) |
| Ru(4)-O(3)   | 2.090(10) |
| Ru(4)-C(62)  | 2.117(16) |
| Ru(4)-C(65)  | 2.143(19) |
| Ru(4)-C(67)  | 2.16(2)   |
| Ru(4)-C(63)  | 2.146(16) |
| Ru(4)-C(64)  | 2.174(15) |
| Ru(4)-C(66)  | 2.19(2)   |

|              |           |
|--------------|-----------|
| Ru(5)-O(7)   | 2.049(11) |
| Ru(5)-C(85)  | 2.07(2)   |
| Ru(5)-O(8)   | 2.071(10) |
| Ru(5)-N(6)   | 2.067(12) |
| Ru(5)-C(83)  | 2.087(19) |
| Ru(5)-C(81)  | 2.12(2)   |
| Ru(5)-C(84)  | 2.152(16) |
| Ru(5)-C(82)  | 2.114(19) |
| Ru(5)-C(86)  | 2.14(2)   |
| Ru(6)-C(107) | 2.09(2)   |
| Ru(6)-C(108) | 2.09(2)   |
| Ru(6)-O(11)  | 2.098(10) |
| Ru(6)-O(12)  | 2.076(11) |
| Ru(6)-C(104) | 2.106(16) |
| Ru(6)-N(5)   | 2.103(14) |
| Ru(6)-C(109) | 2.116(19) |
| Ru(6)-C(106) | 2.203(17) |
| Ru(6)-C(105) | 2.156(16) |
| O(1)-C(112)  | 1.281(18) |
| O(2)-C(111)  | 1.212(18) |
| O(3)-C(112)  | 1.246(18) |
| O(4)-C(111)  | 1.252(18) |
| O(5)-C(80)   | 1.294(19) |
| O(6)-C(90)   | 1.211(19) |
| O(7)-C(90)   | 1.32(2)   |
| O(8)-C(80)   | 1.239(18) |
| O(9)-C(115)  | 1.227(19) |
| O(10)-C(116) | 1.30(2)   |
| O(11)-C(115) | 1.285(19) |
| O(12)-C(116) | 1.22(2)   |
| N(1)-C(2)    | 1.301(17) |
| N(1)-C(1)    | 1.327(18) |
| N(2)-C(20)   | 1.316(17) |
| N(2)-C(19)   | 1.359(17) |
| N(3)-C(27)   | 1.354(18) |
| N(3)-C(28)   | 1.367(19) |
| N(4)-C(29)   | 1.374(17) |
| N(4)-C(30)   | 1.411(19) |



|             |           |
|-------------|-----------|
| N(5)-C(46)  | 1.29(2)   |
| N(5)-C(94)  | 1.370(19) |
| N(6)-C(52)  | 1.326(17) |
| N(6)-C(53)  | 1.38(2)   |
| C(1)-C(3)   | 1.42(2)   |
| C(2)-C(4)   | 1.33(2)   |
| C(3)-C(5)   | 1.38(2)   |
| C(4)-C(5)   | 1.34(2)   |
| C(5)-C(6)   | 1.422(19) |
| C(6)-C(7)   | 1.291(13) |
| C(7)-C(8)   | 1.338(13) |
| C(8)-C(9)   | 1.337(18) |
| C(8)-C(13)  | 1.401(18) |
| C(9)-C(10)  | 1.404(17) |
| C(10)-C(14) | 1.402(19) |
| C(10)-C(11) | 1.385(18) |
| C(11)-C(12) | 1.369(18) |
| C(12)-C(13) | 1.366(17) |
| C(12)-C(22) | 1.476(19) |
| C(14)-C(15) | 1.212(17) |
| C(15)-C(16) | 1.46(2)   |
| C(16)-C(18) | 1.363(19) |
| C(16)-C(17) | 1.364(18) |
| C(17)-C(19) | 1.378(18) |
| C(18)-C(20) | 1.38(2)   |
| C(22)-C(23) | 1.167(17) |
| C(23)-C(24) | 1.44(2)   |
| C(24)-C(26) | 1.34(2)   |
| C(24)-C(25) | 1.405(19) |
| C(25)-C(28) | 1.40(2)   |
| C(26)-C(27) | 1.42(2)   |
| C(29)-C(31) | 1.344(19) |
| C(30)-C(32) | 1.36(2)   |
| C(31)-C(33) | 1.46(2)   |
| C(32)-C(33) | 1.45(2)   |
| C(33)-C(34) | 1.41(2)   |
| C(34)-C(35) | 1.175(19) |
| C(35)-C(36) | 1.42(2)   |

|              |           |
|--------------|-----------|
| C(36)-C(37)  | 1.388(19) |
| C(36)-C(93)  | 1.402(19) |
| C(37)-C(38)  | 1.43(2)   |
| C(38)-C(41)  | 1.357(13) |
| C(38)-C(39)  | 1.36(2)   |
| C(39)-C(40)  | 1.349(19) |
| C(40)-C(93)  | 1.38(2)   |
| C(40)-C(47)  | 1.46(2)   |
| C(41)-C(42)  | 1.291(13) |
| C(42)-C(43)  | 1.36(2)   |
| C(43)-C(44)  | 1.35(2)   |
| C(43)-C(45)  | 1.40(2)   |
| C(44)-C(94)  | 1.43(2)   |
| C(45)-C(46)  | 1.37(2)   |
| C(47)-C(48)  | 1.19(2)   |
| C(48)-C(49)  | 1.40(2)   |
| C(49)-C(51)  | 1.42(2)   |
| C(49)-C(50)  | 1.40(2)   |
| C(50)-C(52)  | 1.32(2)   |
| C(51)-C(53)  | 1.38(2)   |
| C(54)-C(55)  | 1.41(2)   |
| C(54)-C(56)  | 1.44(2)   |
| C(54)-C(60)  | 1.51(2)   |
| C(55)-C(58)  | 1.41(2)   |
| C(56)-C(57)  | 1.40(2)   |
| C(57)-C(59)  | 1.46(2)   |
| C(58)-C(59)  | 1.40(2)   |
| C(59)-C(92)  | 1.50(2)   |
| C(60)-C(91)  | 1.57(2)   |
| C(60)-C(61)  | 1.53(2)   |
| C(62)-C(65)  | 1.38(2)   |
| C(62)-C(63)  | 1.44(2)   |
| C(62)-C(113) | 1.55(2)   |
| C(63)-C(64)  | 1.34(2)   |
| C(64)-C(67)  | 1.37(2)   |
| C(65)-C(66)  | 1.45(2)   |
| C(66)-C(67)  | 1.44(2)   |
| C(67)-C(68)  | 1.59(2)   |

|               |           |
|---------------|-----------|
| C(68)-C(120)  | 1.47(2)   |
| C(68)-C(69)   | 1.52(3)   |
| C(70)-C(78)   | 1.43(2)   |
| C(71)-C(72)   | 1.43(2)   |
| C(71)-C(76)   | 1.415(19) |
| C(72)-C(73)   | 1.45(2)   |
| C(72)-C(77)   | 1.470(18) |
| C(73)-C(74)   | 1.39(2)   |
| C(74)-C(75)   | 1.41(2)   |
| C(75)-C(76)   | 1.51(2)   |
| C(75)-C(78)   | 1.50(2)   |
| C(78)-C(79)   | 1.56(3)   |
| C(80)-C(90)   | 1.65(2)   |
| C(81)-C(85)   | 1.34(2)   |
| C(81)-C(82)   | 1.40(3)   |
| C(81)-C(121)  | 1.51(2)   |
| C(82)-C(86)   | 1.43(3)   |
| C(83)-C(84)   | 1.35(2)   |
| C(83)-C(86)   | 1.38(2)   |
| C(83)-C(87)   | 1.67(2)   |
| C(84)-C(85)   | 1.27(2)   |
| C(87)-C(89)   | 1.55(2)   |
| C(87)-C(88)   | 1.60(2)   |
| C(95)-C(96)   | 1.38(2)   |
| C(95)-C(100)  | 1.42(2)   |
| C(96)-C(97)   | 1.372(19) |
| C(96)-C(102)  | 1.56(2)   |
| C(97)-C(98)   | 1.36(2)   |
| C(98)-C(99)   | 1.48(2)   |
| C(99)-C(101)  | 1.45(2)   |
| C(99)-C(100)  | 1.463(18) |
| C(102)-C(103) | 1.52(2)   |
| C(102)-C(119) | 1.59(2)   |
| C(104)-C(105) | 1.33(2)   |
| C(104)-C(109) | 1.45(3)   |
| C(105)-C(106) | 1.52(2)   |
| C(105)-C(117) | 1.55(3)   |
| C(106)-C(107) | 1.32(2)   |

|               |           |
|---------------|-----------|
| C(107)-C(108) | 1.36(3)   |
| C(108)-C(109) | 1.42(3)   |
| C(108)-C(110) | 1.57(3)   |
| C(111)-C(112) | 1.62(2)   |
| C(114)-C(117) | 1.41(3)   |
| C(115)-C(116) | 1.55(3)   |
| C(117)-C(118) | 1.63(3)   |
| Cl(1)-O(3S)   | 1.400(10) |
| Cl(1)-O(4S)   | 1.421(9)  |
| Cl(1)-O(2S)   | 1.430(10) |
| Cl(1)-O(1S)   | 1.401(8)  |
| Cl(2)-O(8S)   | 1.413(10) |
| Cl(2)-O(7S)   | 1.428(9)  |
| Cl(2)-O(6S)   | 1.429(10) |
| Cl(2)-O(5S)   | 1.439(10) |
| Cl(3)-O(10')  | 1.400(14) |
| Cl(3)-O(10S)  | 1.418(13) |
| Cl(3)-O(9S)   | 1.435(13) |
| Cl(3)-O(11')  | 1.419(14) |
| Cl(3)-O(9')   | 1.426(14) |
| Cl(3)-O(12')  | 1.434(14) |
| Cl(3)-O(11S)  | 1.424(13) |
| Cl(3)-O(12S)  | 1.438(12) |
| O(9S)-O(10')  | 1.02(3)   |
| O(9S)-O(12')  | 1.64(3)   |
| O(9')-O(10S)  | 0.96(3)   |
| O(9')-O(12S)  | 1.82(3)   |
| O(10S)-O(12') | 1.29(3)   |
| O(10')-O(12S) | 1.56(3)   |
| O(11S)-O(11') | 0.53(5)   |
| Cl(4)-O(20S)  | 1.406(14) |
| Cl(4)-O(17S)  | 1.401(14) |
| Cl(4)-O(14S)  | 1.403(11) |
| Cl(4)-O(13S)  | 1.431(13) |
| Cl(4)-O(15S)  | 1.405(12) |
| Cl(4)-O(19S)  | 1.445(14) |
| Cl(4)-O(18S)  | 1.415(13) |
| Cl(4)-O(16S)  | 1.464(12) |

|                   |           |
|-------------------|-----------|
| O(13S)-O(18S)     | 1.37(3)   |
| O(13S)-O(20S)     | 1.37(3)   |
| O(15S)-O(17S)     | 1.30(3)   |
| O(15S)-O(18S)     | 1.32(3)   |
| O(16S)-O(20S)     | 1.25(3)   |
| O(16S)-O(17S)     | 1.45(3)   |
| Cl(5)-O(21S)      | 1.419(15) |
| Cl(5)-O(23S)      | 1.408(15) |
| Cl(5)-O(22S)      | 1.423(15) |
| Cl(5)-O(24S)      | 1.438(15) |
| O(21S)-O(24S)     | 1.89(5)   |
| O(24S)-O(2WA)     | 1.70(6)   |
| Cl(6)-O(27S)      | 1.417(14) |
| Cl(6)-O(25S)      | 1.424(13) |
| Cl(6)-O(26S)      | 1.415(14) |
| Cl(6)-O(28S)      | 1.427(12) |
| N(1N)-C(1N)       | 1.33(4)   |
| N(1N)-O(2N)       | 1.23(3)   |
| N(1N)-O(1N)       | 1.29(3)   |
| O(2WB)-O(2WC)     | 1.98(7)   |
| O(10)-Ru(1)-O(9)  | 78.4(4)   |
| O(10)-Ru(1)-N(1)  | 82.0(4)   |
| O(9)-Ru(1)-N(1)   | 85.1(5)   |
| O(10)-Ru(1)-C(95) | 164.7(5)  |
| O(9)-Ru(1)-C(95)  | 116.9(5)  |
| N(1)-Ru(1)-C(95)  | 97.6(5)   |
| O(10)-Ru(1)-C(97) | 114.9(5)  |
| O(9)-Ru(1)-C(97)  | 94.0(5)   |
| N(1)-Ru(1)-C(97)  | 162.5(5)  |
| C(95)-Ru(1)-C(97) | 67.3(6)   |
| O(10)-Ru(1)-C(98) | 93.1(5)   |
| O(9)-Ru(1)-C(98)  | 119.7(5)  |
| N(1)-Ru(1)-C(98)  | 153.4(6)  |
| C(95)-Ru(1)-C(98) | 80.4(5)   |
| C(97)-Ru(1)-C(98) | 36.7(5)   |
| O(10)-Ru(1)-C(96) | 150.5(5)  |
| O(9)-Ru(1)-C(96)  | 92.3(6)   |

|                    |          |
|--------------------|----------|
| N(1)-Ru(1)-C(96)   | 125.4(5) |
| C(95)-Ru(1)-C(96)  | 37.4(6)  |
| C(97)-Ru(1)-C(96)  | 37.1(5)  |
| C(98)-Ru(1)-C(96)  | 67.1(6)  |
| O(10)-Ru(1)-C(99)  | 96.6(5)  |
| O(9)-Ru(1)-C(99)   | 159.0(5) |
| N(1)-Ru(1)-C(99)   | 114.7(6) |
| C(95)-Ru(1)-C(99)  | 69.6(5)  |
| C(97)-Ru(1)-C(99)  | 69.4(6)  |
| C(98)-Ru(1)-C(99)  | 39.6(6)  |
| C(96)-Ru(1)-C(99)  | 82.1(6)  |
| O(10)-Ru(1)-C(100) | 127.0(5) |
| O(9)-Ru(1)-C(100)  | 154.2(5) |
| N(1)-Ru(1)-C(100)  | 93.3(5)  |
| C(95)-Ru(1)-C(100) | 37.7(5)  |
| C(97)-Ru(1)-C(100) | 79.9(6)  |
| C(98)-Ru(1)-C(100) | 68.7(6)  |
| C(96)-Ru(1)-C(100) | 67.7(6)  |
| C(99)-Ru(1)-C(100) | 38.5(5)  |
| O(1)-Ru(2)-O(2)    | 79.8(4)  |
| O(1)-Ru(2)-N(2)    | 85.8(4)  |
| O(2)-Ru(2)-N(2)    | 82.3(4)  |
| O(1)-Ru(2)-C(76)   | 88.7(5)  |
| O(2)-Ru(2)-C(76)   | 140.2(5) |
| N(2)-Ru(2)-C(76)   | 135.0(5) |
| O(1)-Ru(2)-C(72)   | 130.3(5) |
| O(2)-Ru(2)-C(72)   | 90.3(5)  |
| N(2)-Ru(2)-C(72)   | 141.4(5) |
| C(76)-Ru(2)-C(72)  | 68.6(6)  |
| O(1)-Ru(2)-C(73)   | 167.7(5) |
| O(2)-Ru(2)-C(73)   | 103.5(5) |
| N(2)-Ru(2)-C(73)   | 106.3(6) |
| C(76)-Ru(2)-C(73)  | 81.3(7)  |
| C(72)-Ru(2)-C(73)  | 38.9(6)  |
| O(1)-Ru(2)-C(71)   | 98.6(5)  |
| O(2)-Ru(2)-C(71)   | 106.2(5) |
| N(2)-Ru(2)-C(71)   | 171.0(5) |
| C(76)-Ru(2)-C(71)  | 37.9(5)  |

|                   |          |
|-------------------|----------|
| C(72)-Ru(2)-C(71) | 37.9(5)  |
| C(73)-Ru(2)-C(71) | 69.2(6)  |
| O(1)-Ru(2)-C(75)  | 109.2(5) |
| O(2)-Ru(2)-C(75)  | 170.5(6) |
| N(2)-Ru(2)-C(75)  | 100.8(5) |
| C(76)-Ru(2)-C(75) | 40.3(6)  |
| C(72)-Ru(2)-C(75) | 81.7(6)  |
| C(73)-Ru(2)-C(75) | 67.1(6)  |
| C(71)-Ru(2)-C(75) | 70.3(6)  |
| O(1)-Ru(2)-C(74)  | 144.1(5) |
| O(2)-Ru(2)-C(74)  | 135.0(6) |
| N(2)-Ru(2)-C(74)  | 90.4(5)  |
| C(76)-Ru(2)-C(74) | 69.3(6)  |
| C(72)-Ru(2)-C(74) | 68.5(6)  |
| C(73)-Ru(2)-C(74) | 36.7(6)  |
| C(71)-Ru(2)-C(74) | 81.4(6)  |
| C(75)-Ru(2)-C(74) | 36.8(6)  |
| N(3)-Ru(3)-O(6)   | 83.6(5)  |
| N(3)-Ru(3)-O(5)   | 85.6(5)  |
| O(6)-Ru(3)-O(5)   | 80.3(5)  |
| N(3)-Ru(3)-C(58)  | 152.5(6) |
| O(6)-Ru(3)-C(58)  | 91.8(6)  |
| O(5)-Ru(3)-C(58)  | 120.4(5) |
| N(3)-Ru(3)-C(55)  | 160.7(6) |
| O(6)-Ru(3)-C(55)  | 115.4(6) |
| O(5)-Ru(3)-C(55)  | 93.8(5)  |
| C(58)-Ru(3)-C(55) | 38.0(6)  |
| N(3)-Ru(3)-C(54)  | 123.0(6) |
| O(6)-Ru(3)-C(54)  | 152.4(6) |
| O(5)-Ru(3)-C(54)  | 93.8(5)  |
| C(58)-Ru(3)-C(54) | 67.9(7)  |
| C(55)-Ru(3)-C(54) | 37.7(6)  |
| N(3)-Ru(3)-C(57)  | 91.2(6)  |
| O(6)-Ru(3)-C(57)  | 122.3(6) |
| O(5)-Ru(3)-C(57)  | 156.7(6) |
| C(58)-Ru(3)-C(57) | 68.5(6)  |
| C(55)-Ru(3)-C(57) | 81.8(6)  |
| C(54)-Ru(3)-C(57) | 68.8(6)  |

|                   |          |
|-------------------|----------|
| N(3)-Ru(3)-C(59)  | 114.7(6) |
| O(6)-Ru(3)-C(59)  | 92.2(6)  |
| O(5)-Ru(3)-C(59)  | 157.6(5) |
| C(58)-Ru(3)-C(59) | 38.2(6)  |
| C(55)-Ru(3)-C(59) | 70.3(6)  |
| C(54)-Ru(3)-C(59) | 83.1(7)  |
| C(57)-Ru(3)-C(59) | 39.5(6)  |
| N(3)-Ru(3)-C(56)  | 94.1(6)  |
| O(6)-Ru(3)-C(56)  | 159.9(6) |
| O(5)-Ru(3)-C(56)  | 119.6(6) |
| C(58)-Ru(3)-C(56) | 81.0(7)  |
| C(55)-Ru(3)-C(56) | 69.4(6)  |
| C(54)-Ru(3)-C(56) | 38.8(6)  |
| C(57)-Ru(3)-C(56) | 37.6(6)  |
| C(59)-Ru(3)-C(56) | 70.5(7)  |
| N(4)-Ru(4)-O(4)   | 83.5(5)  |
| N(4)-Ru(4)-O(3)   | 81.9(4)  |
| O(4)-Ru(4)-O(3)   | 79.2(4)  |
| N(4)-Ru(4)-C(62)  | 107.0(7) |
| O(4)-Ru(4)-C(62)  | 98.7(6)  |
| O(3)-Ru(4)-C(62)  | 170.7(7) |
| N(4)-Ru(4)-C(65)  | 89.8(6)  |
| O(4)-Ru(4)-C(65)  | 130.9(6) |
| O(3)-Ru(4)-C(65)  | 147.7(6) |
| C(62)-Ru(4)-C(65) | 37.8(6)  |
| N(4)-Ru(4)-C(67)  | 130.5(6) |
| O(4)-Ru(4)-C(67)  | 143.7(6) |
| O(3)-Ru(4)-C(67)  | 92.2(6)  |
| C(62)-Ru(4)-C(67) | 84.2(7)  |
| C(65)-Ru(4)-C(67) | 69.8(8)  |
| N(4)-Ru(4)-C(63)  | 145.4(6) |
| O(4)-Ru(4)-C(63)  | 93.0(6)  |
| O(3)-Ru(4)-C(63)  | 131.4(6) |
| C(62)-Ru(4)-C(63) | 39.4(7)  |
| C(65)-Ru(4)-C(63) | 66.7(7)  |
| C(67)-Ru(4)-C(63) | 66.5(6)  |
| N(4)-Ru(4)-C(64)  | 166.2(6) |
| O(4)-Ru(4)-C(64)  | 110.2(5) |



|                   |          |
|-------------------|----------|
| O(3)-Ru(4)-C(64)  | 102.1(5) |
| C(62)-Ru(4)-C(64) | 69.9(7)  |
| C(65)-Ru(4)-C(64) | 79.8(6)  |
| C(67)-Ru(4)-C(64) | 36.9(6)  |
| C(63)-Ru(4)-C(64) | 36.0(6)  |
| N(4)-Ru(4)-C(66)  | 98.4(6)  |
| O(4)-Ru(4)-C(66)  | 169.6(5) |
| O(3)-Ru(4)-C(66)  | 111.2(6) |
| C(62)-Ru(4)-C(66) | 70.9(7)  |
| C(65)-Ru(4)-C(66) | 39.2(7)  |
| C(67)-Ru(4)-C(66) | 38.8(6)  |
| C(63)-Ru(4)-C(66) | 79.6(7)  |
| C(64)-Ru(4)-C(66) | 67.8(6)  |
| O(7)-Ru(5)-C(85)  | 94.9(6)  |
| O(7)-Ru(5)-O(8)   | 80.4(4)  |
| C(85)-Ru(5)-O(8)  | 117.7(5) |
| O(7)-Ru(5)-N(6)   | 85.0(5)  |
| C(85)-Ru(5)-N(6)  | 155.7(6) |
| O(8)-Ru(5)-N(6)   | 86.3(4)  |
| O(7)-Ru(5)-C(83)  | 153.8(6) |
| C(85)-Ru(5)-C(83) | 64.1(8)  |
| O(8)-Ru(5)-C(83)  | 95.1(6)  |
| N(6)-Ru(5)-C(83)  | 120.8(7) |
| O(7)-Ru(5)-C(81)  | 93.1(7)  |
| C(85)-Ru(5)-C(81) | 37.3(6)  |
| O(8)-Ru(5)-C(81)  | 154.1(6) |
| N(6)-Ru(5)-C(81)  | 118.3(6) |
| C(83)-Ru(5)-C(81) | 79.7(8)  |
| O(7)-Ru(5)-C(84)  | 116.9(6) |
| C(85)-Ru(5)-C(84) | 35.0(6)  |
| O(8)-Ru(5)-C(84)  | 93.2(5)  |
| N(6)-Ru(5)-C(84)  | 157.8(7) |
| C(83)-Ru(5)-C(84) | 37.2(7)  |
| C(81)-Ru(5)-C(84) | 67.2(7)  |
| O(7)-Ru(5)-C(82)  | 119.5(7) |
| C(85)-Ru(5)-C(82) | 67.5(8)  |
| O(8)-Ru(5)-C(82)  | 159.6(7) |
| N(6)-Ru(5)-C(82)  | 91.4(7)  |

|                     |          |
|---------------------|----------|
| C(83)-Ru(5)-C(82)   | 68.8(8)  |
| C(81)-Ru(5)-C(82)   | 38.5(7)  |
| C(84)-Ru(5)-C(82)   | 81.4(7)  |
| O(7)-Ru(5)-C(86)    | 158.8(6) |
| C(85)-Ru(5)-C(86)   | 79.2(8)  |
| O(8)-Ru(5)-C(86)    | 120.5(6) |
| N(6)-Ru(5)-C(86)    | 92.2(6)  |
| C(83)-Ru(5)-C(86)   | 38.1(6)  |
| C(81)-Ru(5)-C(86)   | 69.8(9)  |
| C(84)-Ru(5)-C(86)   | 69.0(7)  |
| C(82)-Ru(5)-C(86)   | 39.4(7)  |
| C(107)-Ru(6)-C(108) | 37.9(7)  |
| C(107)-Ru(6)-O(11)  | 105.7(7) |
| C(108)-Ru(6)-O(11)  | 89.5(6)  |
| C(107)-Ru(6)-O(12)  | 169.3(6) |
| C(108)-Ru(6)-O(12)  | 134.4(7) |
| O(11)-Ru(6)-O(12)   | 79.3(5)  |
| C(107)-Ru(6)-C(104) | 81.3(7)  |
| C(108)-Ru(6)-C(104) | 71.1(8)  |
| O(11)-Ru(6)-C(104)  | 138.6(5) |
| O(12)-Ru(6)-C(104)  | 88.7(6)  |
| C(107)-Ru(6)-N(5)   | 104.3(7) |
| C(108)-Ru(6)-N(5)   | 136.7(8) |
| O(11)-Ru(6)-N(5)    | 82.2(5)  |
| O(12)-Ru(6)-N(5)    | 85.7(5)  |
| C(104)-Ru(6)-N(5)   | 136.7(7) |
| C(107)-Ru(6)-C(109) | 69.3(8)  |
| C(108)-Ru(6)-C(109) | 39.3(8)  |
| O(11)-Ru(6)-C(109)  | 103.1(6) |
| O(12)-Ru(6)-C(109)  | 100.5(7) |
| C(104)-Ru(6)-C(109) | 40.1(7)  |
| N(5)-Ru(6)-C(109)   | 172.4(7) |
| C(107)-Ru(6)-C(106) | 35.6(7)  |
| C(108)-Ru(6)-C(106) | 67.0(7)  |
| O(11)-Ru(6)-C(106)  | 137.6(6) |
| O(12)-Ru(6)-C(106)  | 142.3(6) |
| C(104)-Ru(6)-C(106) | 68.1(6)  |
| N(5)-Ru(6)-C(106)   | 91.4(6)  |

|                     |           |
|---------------------|-----------|
| C(109)-Ru(6)-C(106) | 81.0(7)   |
| C(107)-Ru(6)-C(105) | 70.3(8)   |
| C(108)-Ru(6)-C(105) | 84.0(8)   |
| O(11)-Ru(6)-C(105)  | 173.0(6)  |
| O(12)-Ru(6)-C(105)  | 103.7(6)  |
| C(104)-Ru(6)-C(105) | 36.3(6)   |
| N(5)-Ru(6)-C(105)   | 104.2(6)  |
| C(109)-Ru(6)-C(105) | 70.2(7)   |
| C(106)-Ru(6)-C(105) | 40.9(7)   |
| C(112)-O(1)-Ru(2)   | 115.7(10) |
| C(111)-O(2)-Ru(2)   | 114.1(9)  |
| C(112)-O(3)-Ru(4)   | 112.3(10) |
| C(111)-O(4)-Ru(4)   | 118.0(11) |
| C(80)-O(5)-Ru(3)    | 115.0(12) |
| C(90)-O(6)-Ru(3)    | 114.3(12) |
| C(90)-O(7)-Ru(5)    | 118.7(11) |
| C(80)-O(8)-Ru(5)    | 113.8(10) |
| C(115)-O(9)-Ru(1)   | 113.6(12) |
| C(116)-O(10)-Ru(1)  | 115.3(11) |
| C(115)-O(11)-Ru(6)  | 114.4(11) |
| C(116)-O(12)-Ru(6)  | 113.5(13) |
| C(2)-N(1)-C(1)      | 117.2(13) |
| C(2)-N(1)-Ru(1)     | 122.4(11) |
| C(1)-N(1)-Ru(1)     | 119.9(9)  |
| C(20)-N(2)-C(19)    | 120.0(13) |
| C(20)-N(2)-Ru(2)    | 119.8(10) |
| C(19)-N(2)-Ru(2)    | 120.2(9)  |
| C(27)-N(3)-C(28)    | 118.2(13) |
| C(27)-N(3)-Ru(3)    | 117.1(11) |
| C(28)-N(3)-Ru(3)    | 124.4(9)  |
| C(29)-N(4)-C(30)    | 123.5(13) |
| C(29)-N(4)-Ru(4)    | 117.5(11) |
| C(30)-N(4)-Ru(4)    | 119.0(10) |
| C(46)-N(5)-C(94)    | 119.4(15) |
| C(46)-N(5)-Ru(6)    | 123.0(11) |
| C(94)-N(5)-Ru(6)    | 117.5(12) |
| C(52)-N(6)-C(53)    | 114.1(13) |
| C(52)-N(6)-Ru(5)    | 124.1(12) |

|                   |           |
|-------------------|-----------|
| C(53)-N(6)-Ru(5)  | 121.3(10) |
| N(1)-C(1)-C(3)    | 121.2(14) |
| N(1)-C(2)-C(4)    | 123.6(17) |
| C(1)-C(3)-C(5)    | 119.2(16) |
| C(2)-C(4)-C(5)    | 122.6(16) |
| C(6)-C(5)-C(4)    | 121.8(14) |
| C(6)-C(5)-C(3)    | 122.4(16) |
| C(4)-C(5)-C(3)    | 115.9(14) |
| C(7)-C(6)-C(5)    | 176.4(16) |
| C(6)-C(7)-C(8)    | 171.2(17) |
| C(9)-C(8)-C(7)    | 122.2(14) |
| C(9)-C(8)-C(13)   | 117.2(12) |
| C(7)-C(8)-C(13)   | 120.4(14) |
| C(8)-C(9)-C(10)   | 123.5(12) |
| C(14)-C(10)-C(9)  | 124.8(12) |
| C(14)-C(10)-C(11) | 117.6(12) |
| C(9)-C(10)-C(11)  | 117.4(13) |
| C(10)-C(11)-C(12) | 120.2(12) |
| C(13)-C(12)-C(11) | 120.3(12) |
| C(13)-C(12)-C(22) | 120.8(13) |
| C(11)-C(12)-C(22) | 118.9(12) |
| C(8)-C(13)-C(12)  | 121.2(14) |
| C(15)-C(14)-C(10) | 176.4(14) |
| C(14)-C(15)-C(16) | 173.7(15) |
| C(18)-C(16)-C(17) | 120.0(14) |
| C(18)-C(16)-C(15) | 119.6(13) |
| C(17)-C(16)-C(15) | 120.3(13) |
| C(19)-C(17)-C(16) | 119.6(14) |
| C(16)-C(18)-C(20) | 118.3(14) |
| N(2)-C(19)-C(17)  | 119.8(13) |
| N(2)-C(20)-C(18)  | 122.0(14) |
| C(23)-C(22)-C(12) | 177.2(17) |
| C(22)-C(23)-C(24) | 173.8(18) |
| C(26)-C(24)-C(25) | 120.0(14) |
| C(26)-C(24)-C(23) | 123.3(13) |
| C(25)-C(24)-C(23) | 116.6(16) |
| C(24)-C(25)-C(28) | 116.8(16) |
| C(24)-C(26)-C(27) | 121.3(14) |

|                   |           |
|-------------------|-----------|
| N(3)-C(27)-C(26)  | 119.7(16) |
| N(3)-C(28)-C(25)  | 123.7(14) |
| C(31)-C(29)-N(4)  | 116.3(15) |
| C(32)-C(30)-N(4)  | 119.8(14) |
| C(29)-C(31)-C(33) | 125.1(14) |
| C(30)-C(32)-C(33) | 120.3(16) |
| C(32)-C(33)-C(34) | 121.2(15) |
| C(32)-C(33)-C(31) | 114.8(14) |
| C(34)-C(33)-C(31) | 123.8(14) |
| C(35)-C(34)-C(33) | 175(2)    |
| C(34)-C(35)-C(36) | 174(2)    |
| C(37)-C(36)-C(35) | 120.8(14) |
| C(37)-C(36)-C(93) | 120.9(15) |
| C(35)-C(36)-C(93) | 118.1(14) |
| C(36)-C(37)-C(38) | 119.5(14) |
| C(41)-C(38)-C(39) | 122.8(15) |
| C(41)-C(38)-C(37) | 120.0(15) |
| C(39)-C(38)-C(37) | 117.1(14) |
| C(40)-C(39)-C(38) | 123.4(16) |
| C(93)-C(40)-C(39) | 121.0(15) |
| C(93)-C(40)-C(47) | 119.5(14) |
| C(39)-C(40)-C(47) | 119.4(15) |
| C(42)-C(41)-C(38) | 174.6(18) |
| C(41)-C(42)-C(43) | 173.5(17) |
| C(44)-C(43)-C(42) | 118.7(16) |
| C(44)-C(43)-C(45) | 119.5(16) |
| C(42)-C(43)-C(45) | 121.8(18) |
| C(43)-C(44)-C(94) | 119.2(16) |
| C(43)-C(45)-C(46) | 118.0(17) |
| N(5)-C(46)-C(45)  | 124.4(17) |
| C(48)-C(47)-C(40) | 179(2)    |
| C(47)-C(48)-C(49) | 175(2)    |
| C(51)-C(49)-C(48) | 121.5(16) |
| C(51)-C(49)-C(50) | 114.1(14) |
| C(48)-C(49)-C(50) | 124.4(15) |
| C(52)-C(50)-C(49) | 122.1(16) |
| C(53)-C(51)-C(49) | 120.0(16) |
| N(6)-C(52)-C(50)  | 126.2(16) |

|                    |           |
|--------------------|-----------|
| C(51)-C(53)-N(6)   | 123.4(15) |
| C(55)-C(54)-C(56)  | 121.3(16) |
| C(55)-C(54)-C(60)  | 117.2(15) |
| C(56)-C(54)-C(60)  | 121.3(16) |
| C(55)-C(54)-Ru(3)  | 72.0(9)   |
| C(56)-C(54)-Ru(3)  | 71.0(9)   |
| C(60)-C(54)-Ru(3)  | 126.8(13) |
| C(58)-C(55)-C(54)  | 117.2(15) |
| C(58)-C(55)-Ru(3)  | 68.9(9)   |
| C(54)-C(55)-Ru(3)  | 70.4(9)   |
| C(57)-C(56)-C(54)  | 118.8(17) |
| C(57)-C(56)-Ru(3)  | 70.8(11)  |
| C(54)-C(56)-Ru(3)  | 70.2(10)  |
| C(59)-C(57)-C(56)  | 121.5(16) |
| C(59)-C(57)-Ru(3)  | 69.3(10)  |
| C(56)-C(57)-Ru(3)  | 71.5(11)  |
| C(55)-C(58)-C(59)  | 125.0(17) |
| C(55)-C(58)-Ru(3)  | 73.0(9)   |
| C(59)-C(58)-Ru(3)  | 71.2(9)   |
| C(58)-C(59)-C(57)  | 115.9(16) |
| C(58)-C(59)-C(92)  | 122.7(17) |
| C(57)-C(59)-C(92)  | 121.5(15) |
| C(58)-C(59)-Ru(3)  | 70.6(10)  |
| C(57)-C(59)-Ru(3)  | 71.2(10)  |
| C(92)-C(59)-Ru(3)  | 128.3(13) |
| C(54)-C(60)-C(91)  | 110.4(17) |
| C(54)-C(60)-C(61)  | 117.5(14) |
| C(91)-C(60)-C(61)  | 107.9(15) |
| C(65)-C(62)-C(63)  | 113.7(18) |
| C(65)-C(62)-C(113) | 123.0(19) |
| C(63)-C(62)-C(113) | 123.1(18) |
| C(65)-C(62)-Ru(4)  | 72.1(11)  |
| C(63)-C(62)-Ru(4)  | 71.4(9)   |
| C(113)-C(62)-Ru(4) | 128.3(13) |
| C(64)-C(63)-C(62)  | 124.8(18) |
| C(64)-C(63)-Ru(4)  | 73.1(9)   |
| C(62)-C(63)-Ru(4)  | 69.2(10)  |
| C(63)-C(64)-C(67)  | 121.1(18) |

|                    |           |
|--------------------|-----------|
| C(63)-C(64)-Ru(4)  | 70.9(10)  |
| C(67)-C(64)-Ru(4)  | 71.1(10)  |
| C(62)-C(65)-C(66)  | 123.8(18) |
| C(62)-C(65)-Ru(4)  | 70.1(11)  |
| C(66)-C(65)-Ru(4)  | 72.1(10)  |
| C(67)-C(66)-C(65)  | 116.5(17) |
| C(67)-C(66)-Ru(4)  | 69.7(11)  |
| C(65)-C(66)-Ru(4)  | 68.7(11)  |
| C(64)-C(67)-C(66)  | 119.3(17) |
| C(64)-C(67)-C(68)  | 122.2(17) |
| C(66)-C(67)-C(68)  | 118.5(15) |
| C(64)-C(67)-Ru(4)  | 71.9(11)  |
| C(66)-C(67)-Ru(4)  | 71.6(11)  |
| C(68)-C(67)-Ru(4)  | 125.6(12) |
| C(120)-C(68)-C(67) | 110.1(16) |
| C(120)-C(68)-C(69) | 115.8(18) |
| C(67)-C(68)-C(69)  | 109.5(15) |
| C(72)-C(71)-C(76)  | 118.2(16) |
| C(72)-C(71)-Ru(2)  | 70.1(9)   |
| C(76)-C(71)-Ru(2)  | 68.7(9)   |
| C(71)-C(72)-C(73)  | 119.7(13) |
| C(71)-C(72)-C(77)  | 120.5(15) |
| C(73)-C(72)-C(77)  | 119.8(14) |
| C(71)-C(72)-Ru(2)  | 71.9(9)   |
| C(73)-C(72)-Ru(2)  | 70.4(9)   |
| C(77)-C(72)-Ru(2)  | 129.0(11) |
| C(74)-C(73)-C(72)  | 121.9(15) |
| C(74)-C(73)-Ru(2)  | 73.6(10)  |
| C(72)-C(73)-Ru(2)  | 70.7(9)   |
| C(73)-C(74)-C(75)  | 121.3(16) |
| C(73)-C(74)-Ru(2)  | 69.7(10)  |
| C(75)-C(74)-Ru(2)  | 71.7(11)  |
| C(76)-C(75)-C(78)  | 121.6(16) |
| C(76)-C(75)-C(74)  | 116.9(14) |
| C(78)-C(75)-C(74)  | 121.4(17) |
| C(76)-C(75)-Ru(2)  | 66.7(8)   |
| C(78)-C(75)-Ru(2)  | 132.1(12) |
| C(74)-C(75)-Ru(2)  | 71.5(10)  |

|                    |           |
|--------------------|-----------|
| C(75)-C(76)-C(71)  | 121.8(15) |
| C(75)-C(76)-Ru(2)  | 73.0(9)   |
| C(71)-C(76)-Ru(2)  | 73.4(9)   |
| C(75)-C(78)-C(79)  | 113.6(16) |
| C(75)-C(78)-C(70)  | 107.7(15) |
| C(79)-C(78)-C(70)  | 109.6(19) |
| O(8)-C(80)-O(5)    | 130.1(16) |
| O(8)-C(80)-C(90)   | 119.4(17) |
| O(5)-C(80)-C(90)   | 110.5(18) |
| C(85)-C(81)-C(82)  | 116.0(19) |
| C(85)-C(81)-C(121) | 127(2)    |
| C(82)-C(81)-C(121) | 116.2(17) |
| C(85)-C(81)-Ru(5)  | 69.1(12)  |
| C(82)-C(81)-Ru(5)  | 70.4(12)  |
| C(121)-C(81)-Ru(5) | 122.9(15) |
| C(81)-C(82)-C(86)  | 119.1(19) |
| C(81)-C(82)-Ru(5)  | 71.1(13)  |
| C(86)-C(82)-Ru(5)  | 71.3(11)  |
| C(84)-C(83)-C(86)  | 125.6(19) |
| C(84)-C(83)-C(87)  | 114.9(16) |
| C(86)-C(83)-C(87)  | 119.0(19) |
| C(84)-C(83)-Ru(5)  | 74.0(12)  |
| C(86)-C(83)-Ru(5)  | 73.1(11)  |
| C(87)-C(83)-Ru(5)  | 120.7(12) |
| C(85)-C(84)-C(83)  | 114.5(18) |
| C(85)-C(84)-Ru(5)  | 68.9(11)  |
| C(83)-C(84)-Ru(5)  | 68.8(11)  |
| C(84)-C(85)-C(81)  | 130(2)    |
| C(84)-C(85)-Ru(5)  | 76.1(13)  |
| C(81)-C(85)-Ru(5)  | 73.5(13)  |
| C(83)-C(86)-C(82)  | 115(2)    |
| C(83)-C(86)-Ru(5)  | 68.8(11)  |
| C(82)-C(86)-Ru(5)  | 69.3(12)  |
| C(83)-C(87)-C(89)  | 110.0(14) |
| C(83)-C(87)-C(88)  | 111.2(15) |
| C(89)-C(87)-C(88)  | 109.7(16) |
| O(6)-C(90)-O(7)    | 133.2(17) |
| O(6)-C(90)-C(80)   | 118.9(18) |



|                      |           |
|----------------------|-----------|
| O(7)-C(90)-C(80)     | 107.3(17) |
| C(40)-C(93)-C(36)    | 117.8(14) |
| N(5)-C(94)-C(44)     | 119.3(17) |
| C(96)-C(95)-C(100)   | 121.9(13) |
| C(96)-C(95)-Ru(1)    | 72.0(9)   |
| C(100)-C(95)-Ru(1)   | 74.1(9)   |
| C(97)-C(96)-C(95)    | 119.3(15) |
| C(97)-C(96)-C(102)   | 119.6(16) |
| C(95)-C(96)-C(102)   | 120.8(13) |
| C(97)-C(96)-Ru(1)    | 70.3(9)   |
| C(95)-C(96)-Ru(1)    | 70.7(10)  |
| C(102)-C(96)-Ru(1)   | 126.1(12) |
| C(96)-C(97)-C(98)    | 122.7(16) |
| C(96)-C(97)-Ru(1)    | 72.6(9)   |
| C(98)-C(97)-Ru(1)    | 72.4(9)   |
| C(97)-C(98)-C(99)    | 121.5(13) |
| C(97)-C(98)-Ru(1)    | 70.8(8)   |
| C(99)-C(98)-Ru(1)    | 71.9(8)   |
| C(101)-C(99)-C(100)  | 123.9(15) |
| C(101)-C(99)-C(98)   | 121.3(13) |
| C(100)-C(99)-C(98)   | 114.8(14) |
| C(101)-C(99)-Ru(1)   | 128.3(11) |
| C(100)-C(99)-Ru(1)   | 71.6(8)   |
| C(98)-C(99)-Ru(1)    | 68.6(9)   |
| C(95)-C(100)-C(99)   | 119.4(14) |
| C(95)-C(100)-Ru(1)   | 68.2(9)   |
| C(99)-C(100)-Ru(1)   | 69.9(9)   |
| C(103)-C(102)-C(96)  | 117.2(15) |
| C(103)-C(102)-C(119) | 106.5(15) |
| C(96)-C(102)-C(119)  | 106.1(15) |
| C(105)-C(104)-C(109) | 124.3(18) |
| C(105)-C(104)-Ru(6)  | 73.9(9)   |
| C(109)-C(104)-Ru(6)  | 70.3(11)  |
| C(104)-C(105)-C(106) | 115.4(17) |
| C(104)-C(105)-C(117) | 125.6(18) |
| C(106)-C(105)-C(117) | 119.0(15) |
| C(104)-C(105)-Ru(6)  | 69.8(10)  |
| C(106)-C(105)-Ru(6)  | 71.2(9)   |

|                      |           |
|----------------------|-----------|
| C(117)-C(105)-Ru(6)  | 130.5(14) |
| C(107)-C(106)-C(105) | 118.8(17) |
| C(107)-C(106)-Ru(6)  | 67.7(12)  |
| C(105)-C(106)-Ru(6)  | 67.9(9)   |
| C(106)-C(107)-C(108) | 125(2)    |
| C(106)-C(107)-Ru(6)  | 76.7(13)  |
| C(108)-C(107)-Ru(6)  | 70.9(14)  |
| C(107)-C(108)-C(109) | 119(2)    |
| C(107)-C(108)-C(110) | 120(2)    |
| C(109)-C(108)-C(110) | 121(2)    |
| C(107)-C(108)-Ru(6)  | 71.2(14)  |
| C(109)-C(108)-Ru(6)  | 71.3(13)  |
| C(110)-C(108)-Ru(6)  | 125.9(14) |
| C(104)-C(109)-C(108) | 116.8(18) |
| C(104)-C(109)-Ru(6)  | 69.6(10)  |
| C(108)-C(109)-Ru(6)  | 69.4(12)  |
| O(4)-C(111)-O(2)     | 131.3(15) |
| O(4)-C(111)-C(112)   | 110.2(17) |
| O(2)-C(111)-C(112)   | 118.5(14) |
| O(3)-C(112)-O(1)     | 128.9(15) |
| O(3)-C(112)-C(111)   | 119.4(15) |
| O(1)-C(112)-C(111)   | 111.7(17) |
| O(11)-C(115)-O(9)    | 126.3(17) |
| O(11)-C(115)-C(116)  | 112.8(17) |
| O(9)-C(115)-C(116)   | 120.8(19) |
| O(12)-C(116)-O(10)   | 128.0(18) |
| O(12)-C(116)-C(115)  | 120(2)    |
| O(10)-C(116)-C(115)  | 112.0(17) |
| C(114)-C(117)-C(105) | 112.3(18) |
| C(114)-C(117)-C(118) | 112.5(19) |
| C(105)-C(117)-C(118) | 105.4(18) |
| O(3S)-Cl(1)-O(4S)    | 110.5(7)  |
| O(3S)-Cl(1)-O(2S)    | 109.7(8)  |
| O(4S)-Cl(1)-O(2S)    | 106.3(7)  |
| O(3S)-Cl(1)-O(1S)    | 111.7(7)  |
| O(4S)-Cl(1)-O(1S)    | 111.3(6)  |
| O(2S)-Cl(1)-O(1S)    | 107.2(6)  |
| O(8S)-Cl(2)-O(7S)    | 111.5(8)  |

|                     |           |
|---------------------|-----------|
| O(8S)-Cl(2)-O(6S)   | 109.8(7)  |
| O(7S)-Cl(2)-O(6S)   | 110.2(7)  |
| O(8S)-Cl(2)-O(5S)   | 107.7(9)  |
| O(7S)-Cl(2)-O(5S)   | 108.4(7)  |
| O(6S)-Cl(2)-O(5S)   | 109.2(7)  |
| O(10')-Cl(3)-O(10S) | 117.7(16) |
| O(10')-Cl(3)-O(9S)  | 42.3(13)  |
| O(10S)-Cl(3)-O(9S)  | 110.4(10) |
| O(10')-Cl(3)-O(11') | 109(2)    |
| O(10S)-Cl(3)-O(11') | 132.4(19) |
| O(9S)-Cl(3)-O(11')  | 97(2)     |
| O(10')-Cl(3)-O(9')  | 126.4(18) |
| O(10S)-Cl(3)-O(9')  | 39.4(12)  |
| O(9S)-Cl(3)-O(9')   | 146.1(14) |
| O(11')-Cl(3)-O(9')  | 116(2)    |
| O(10')-Cl(3)-O(12') | 105.2(18) |
| O(10S)-Cl(3)-O(12') | 53.7(12)  |
| O(9S)-Cl(3)-O(12')  | 69.8(14)  |
| O(11')-Cl(3)-O(12') | 105.7(17) |
| O(9')-Cl(3)-O(12')  | 90.7(17)  |
| O(10')-Cl(3)-O(11S) | 129.7(17) |
| O(10S)-Cl(3)-O(11S) | 111.0(11) |
| O(9S)-Cl(3)-O(11S)  | 109.3(10) |
| O(11')-Cl(3)-O(11S) | 21(2)     |
| O(9')-Cl(3)-O(11S)  | 98.9(16)  |
| O(12')-Cl(3)-O(11S) | 93.4(14)  |
| O(10')-Cl(3)-O(12S) | 66.5(14)  |
| O(10S)-Cl(3)-O(12S) | 109.2(9)  |
| O(9S)-Cl(3)-O(12S)  | 108.1(10) |
| O(11')-Cl(3)-O(12S) | 97.7(16)  |
| O(9')-Cl(3)-O(12S)  | 78.8(14)  |
| O(12')-Cl(3)-O(12S) | 156.6(12) |
| O(11S)-Cl(3)-O(12S) | 108.8(10) |
| O(10')-O(9S)-Cl(3)  | 67.0(12)  |
| O(10')-O(9S)-O(12') | 113.3(19) |
| Cl(3)-O(9S)-O(12')  | 55.1(9)   |
| O(10S)-O(9')-Cl(3)  | 69.8(12)  |
| O(10S)-O(9')-O(12S) | 110.0(19) |

|                     |           |
|---------------------|-----------|
| Cl(3)-O(9')-O(12S)  | 50.9(9)   |
| O(9')-O(10S)-O(12') | 129(2)    |
| O(9')-O(10S)-Cl(3)  | 70.8(12)  |
| O(12')-O(10S)-Cl(3) | 63.8(9)   |
| O(9S)-O(10')-Cl(3)  | 70.7(12)  |
| O(9S)-O(10')-O(12S) | 127.6(17) |
| Cl(3)-O(10')-O(12S) | 57.9(10)  |
| O(11')-O(11S)-Cl(3) | 79(2)     |
| O(11S)-O(11')-Cl(3) | 80(2)     |
| Cl(3)-O(12S)-O(10') | 55.6(8)   |
| Cl(3)-O(12S)-O(9')  | 50.3(8)   |
| O(10')-O(12S)-O(9') | 96.4(13)  |
| O(10S)-O(12')-Cl(3) | 62.5(9)   |
| O(10S)-O(12')-O(9S) | 105.6(15) |
| Cl(3)-O(12')-O(9S)  | 55.1(9)   |
| O(20S)-Cl(4)-O(17S) | 111.6(12) |
| O(20S)-Cl(4)-O(14S) | 110.3(18) |
| O(17S)-Cl(4)-O(14S) | 99.9(17)  |
| O(20S)-Cl(4)-O(13S) | 57.8(13)  |
| O(17S)-Cl(4)-O(13S) | 149.2(16) |
| O(14S)-Cl(4)-O(13S) | 110.9(10) |
| O(20S)-Cl(4)-O(15S) | 136.1(17) |
| O(17S)-Cl(4)-O(15S) | 55.4(12)  |
| O(14S)-Cl(4)-O(15S) | 113.2(10) |
| O(13S)-Cl(4)-O(15S) | 109.6(10) |
| O(20S)-Cl(4)-O(19S) | 108.5(11) |
| O(17S)-Cl(4)-O(19S) | 107.6(11) |
| O(14S)-Cl(4)-O(19S) | 8.0(19)   |
| O(13S)-Cl(4)-O(19S) | 103.1(18) |
| O(15S)-Cl(4)-O(19S) | 115.4(18) |
| O(20S)-Cl(4)-O(18S) | 110.8(11) |
| O(17S)-Cl(4)-O(18S) | 110.7(11) |
| O(14S)-Cl(4)-O(18S) | 113.1(15) |
| O(13S)-Cl(4)-O(18S) | 57.5(12)  |
| O(15S)-Cl(4)-O(18S) | 55.8(11)  |
| O(19S)-Cl(4)-O(18S) | 107.4(11) |
| O(20S)-Cl(4)-O(16S) | 51.8(13)  |
| O(17S)-Cl(4)-O(16S) | 60.9(12)  |

|                      |           |
|----------------------|-----------|
| O(14S)-Cl(4)-O(16S)  | 108.7(9)  |
| O(13S)-Cl(4)-O(16S)  | 107.0(10) |
| O(15S)-Cl(4)-O(16S)  | 107.2(10) |
| O(19S)-Cl(4)-O(16S)  | 114.1(17) |
| O(18S)-Cl(4)-O(16S)  | 138.2(14) |
| O(18S)-O(13S)-O(20S) | 115.8(15) |
| O(18S)-O(13S)-Cl(4)  | 60.7(9)   |
| O(20S)-O(13S)-Cl(4)  | 60.2(10)  |
| O(17S)-O(15S)-O(18S) | 124.0(14) |
| O(17S)-O(15S)-Cl(4)  | 62.1(10)  |
| O(18S)-O(15S)-Cl(4)  | 62.5(9)   |
| O(20S)-O(16S)-Cl(4)  | 61.7(10)  |
| O(20S)-O(16S)-O(17S) | 118.0(14) |
| Cl(4)-O(16S)-O(17S)  | 57.4(8)   |
| O(15S)-O(17S)-Cl(4)  | 62.5(9)   |
| O(15S)-O(17S)-O(16S) | 113.6(17) |
| Cl(4)-O(17S)-O(16S)  | 61.7(9)   |
| O(13S)-O(18S)-O(15S) | 119.0(15) |
| O(13S)-O(18S)-Cl(4)  | 61.8(9)   |
| O(15S)-O(18S)-Cl(4)  | 61.7(9)   |
| O(16S)-O(20S)-Cl(4)  | 66.5(10)  |
| O(16S)-O(20S)-O(13S) | 124.7(16) |
| Cl(4)-O(20S)-O(13S)  | 62.0(10)  |
| O(21S)-Cl(5)-O(23S)  | 85(4)     |
| O(21S)-Cl(5)-O(22S)  | 118(4)    |
| O(23S)-Cl(5)-O(22S)  | 130(3)    |
| O(21S)-Cl(5)-O(24S)  | 83(3)     |
| O(23S)-Cl(5)-O(24S)  | 111(3)    |
| O(22S)-Cl(5)-O(24S)  | 115(3)    |
| Cl(5)-O(21S)-O(24S)  | 48.9(16)  |
| Cl(5)-O(24S)-O(2WA)  | 142(3)    |
| Cl(5)-O(24S)-O(21S)  | 48.0(15)  |
| O(2WA)-O(24S)-O(21S) | 113(3)    |
| O(27S)-Cl(6)-O(25S)  | 110.1(11) |
| O(27S)-Cl(6)-O(26S)  | 111.0(11) |
| O(25S)-Cl(6)-O(26S)  | 108.1(11) |
| O(27S)-Cl(6)-O(28S)  | 108.7(11) |
| O(25S)-Cl(6)-O(28S)  | 109.5(10) |

|                     |           |
|---------------------|-----------|
| O(26S)-Cl(6)-O(28S) | 109.4(10) |
| C(1N)-N(1N)-O(2N)   | 120(3)    |
| C(1N)-N(1N)-O(1N)   | 109(3)    |
| O(2N)-N(1N)-O(1N)   | 130(3)    |

---

Symmetry transformations used to generate equivalent atoms:

Table 4. Anisotropic displacement parameters ( $\text{\AA}^2 \times 10^3$ ) for p-1. The anisotropic displacement factor exponent takes the form:  $-2\pi^2 [ h^2 a^{*2} U^{11} + \dots + 2 h k a^* b^* U^{12} ]$

|       | U <sup>11</sup> | U <sup>22</sup> | U <sup>33</sup> | U <sup>23</sup> | U <sup>13</sup> | U <sup>12</sup> |
|-------|-----------------|-----------------|-----------------|-----------------|-----------------|-----------------|
| Ru(1) | 124(1)          | 66(1)           | 126(1)          | 36(1)           | 29(1)           | 18(1)           |
| Ru(2) | 129(1)          | 80(1)           | 113(1)          | 32(1)           | 20(1)           | 15(1)           |
| Ru(3) | 132(1)          | 89(1)           | 143(1)          | 55(1)           | 34(1)           | 19(1)           |
| Ru(4) | 133(1)          | 79(1)           | 125(1)          | 24(1)           | 28(1)           | 8(1)            |
| Ru(5) | 152(2)          | 100(1)          | 150(1)          | 64(1)           | 52(1)           | 39(1)           |
| Ru(6) | 128(1)          | 95(1)           | 138(1)          | 46(1)           | 18(1)           | 9(1)            |
| O(1)  | 146(8)          | 76(5)           | 101(6)          | 29(5)           | 17(6)           | 4(5)            |
| O(2)  | 109(8)          | 87(5)           | 115(7)          | 34(5)           | 10(7)           | 5(5)            |
| O(3)  | 136(8)          | 94(6)           | 124(8)          | 45(5)           | 28(8)           | 28(6)           |
| O(4)  | 105(8)          | 85(5)           | 127(7)          | 23(5)           | 28(6)           | 14(5)           |
| O(5)  | 122(9)          | 103(6)          | 148(8)          | 55(6)           | 49(7)           | 32(6)           |
| O(6)  | 117(8)          | 116(7)          | 147(9)          | 58(6)           | 29(8)           | 26(6)           |
| O(7)  | 127(9)          | 95(6)           | 141(8)          | 54(5)           | 29(6)           | 29(5)           |
| O(8)  | 103(8)          | 97(6)           | 144(8)          | 54(5)           | 38(7)           | 25(5)           |
| O(9)  | 112(8)          | 81(5)           | 124(7)          | 39(5)           | 30(6)           | 22(5)           |
| O(10) | 139(8)          | 74(5)           | 112(7)          | 45(5)           | 9(7)            | 8(6)            |
| O(11) | 123(8)          | 80(5)           | 127(7)          | 40(5)           | 14(7)           | 13(6)           |
| O(12) | 125(9)          | 93(6)           | 136(8)          | 52(6)           | 19(7)           | 18(5)           |
| N(1)  | 143(12)         | 71(6)           | 123(9)          | 43(6)           | 36(8)           | 22(6)           |
| N(2)  | 113(10)         | 79(6)           | 131(8)          | 46(6)           | 24(7)           | 14(6)           |
| N(3)  | 139(12)         | 82(6)           | 131(10)         | 37(7)           | 32(7)           | 14(6)           |
| N(4)  | 128(11)         | 87(6)           | 124(9)          | 28(6)           | 20(7)           | 0(6)            |
| N(5)  | 159(14)         | 106(8)          | 125(10)         | 40(7)           | 36(9)           | 10(7)           |
| N(6)  | 144(12)         | 87(6)           | 146(8)          | 55(7)           | 35(9)           | 32(7)           |
| C(1)  | 158(16)         | 63(6)           | 159(13)         | 39(7)           | 66(11)          | 29(7)           |
| C(2)  | 210(20)         | 74(7)           | 145(12)         | 23(7)           | 65(12)          | -12(9)          |
| C(3)  | 187(18)         | 95(7)           | 120(11)         | 36(7)           | 49(11)          | 10(9)           |
| C(4)  | 280(30)         | 73(7)           | 132(13)         | 27(7)           | 76(14)          | -8(10)          |
| C(5)  | 153(15)         | 75(6)           | 110(9)          | 33(6)           | 13(9)           | 11(7)           |
| C(6)  | 137(14)         | 100(6)          | 104(10)         | 33(6)           | 22(9)           | 8(8)            |
| C(7)  | 177(17)         | 81(6)           | 139(11)         | 42(5)           | 70(11)          | 40(9)           |
| C(8)  | 130(14)         | 81(5)           | 114(8)          | 34(5)           | 15(10)          | 7(8)            |
| C(9)  | 126(13)         | 78(6)           | 117(7)          | 44(5)           | 34(9)           | 32(7)           |

|       |         |         |         |       |        |         |
|-------|---------|---------|---------|-------|--------|---------|
| C(10) | 121(13) | 79(6)   | 115(6)  | 37(5) | 19(9)  | 10(7)   |
| C(11) | 107(12) | 80(6)   | 109(7)  | 39(6) | 32(8)  | 11(7)   |
| C(12) | 113(12) | 82(6)   | 104(8)  | 34(6) | 25(8)  | 8(7)    |
| C(13) | 112(12) | 81(6)   | 113(9)  | 35(6) | 7(8)   | 11(7)   |
| C(14) | 98(11)  | 80(7)   | 115(6)  | 39(6) | 12(9)  | 17(7)   |
| C(15) | 85(11)  | 91(8)   | 116(6)  | 46(7) | 20(9)  | 1(7)    |
| C(16) | 84(11)  | 88(7)   | 117(6)  | 39(6) | 18(8)  | 8(7)    |
| C(17) | 103(12) | 77(7)   | 117(7)  | 37(6) | 12(9)  | 4(7)    |
| C(18) | 167(16) | 69(7)   | 123(8)  | 37(7) | 15(11) | 10(8)   |
| C(19) | 125(13) | 74(7)   | 122(8)  | 44(7) | 32(9)  | 9(7)    |
| C(20) | 171(17) | 82(8)   | 120(9)  | 41(7) | 25(11) | 28(8)   |
| C(22) | 115(13) | 92(8)   | 118(10) | 43(7) | 26(9)  | 23(8)   |
| C(23) | 132(14) | 92(8)   | 116(11) | 40(7) | 30(9)  | 28(8)   |
| C(24) | 124(14) | 86(7)   | 147(13) | 55(8) | 25(8)  | 18(7)   |
| C(25) | 117(13) | 105(8)  | 141(12) | 51(8) | 26(8)  | 8(7)    |
| C(26) | 128(14) | 94(8)   | 147(13) | 54(9) | 19(8)  | 11(8)   |
| C(27) | 147(15) | 102(9)  | 157(14) | 66(9) | 1(10)  | 1(8)    |
| C(28) | 134(14) | 81(8)   | 151(14) | 49(8) | 25(8)  | 4(8)    |
| C(29) | 103(12) | 82(7)   | 114(8)  | 20(7) | 16(8)  | 13(7)   |
| C(30) | 112(14) | 96(8)   | 135(10) | 40(6) | 44(9)  | 16(8)   |
| C(31) | 133(15) | 91(8)   | 127(9)  | 32(6) | 21(9)  | 20(8)   |
| C(32) | 115(14) | 111(8)  | 134(9)  | 43(7) | 25(10) | 23(9)   |
| C(33) | 119(14) | 107(8)  | 121(7)  | 44(6) | 31(9)  | 16(8)   |
| C(34) | 163(18) | 102(9)  | 122(7)  | 49(7) | 29(12) | 12(10)  |
| C(35) | 114(15) | 116(10) | 121(7)  | 45(7) | 23(11) | 15(9)   |
| C(36) | 81(11)  | 109(7)  | 124(7)  | 48(6) | 20(8)  | 4(8)    |
| C(37) | 121(14) | 104(7)  | 133(8)  | 48(6) | 25(10) | 11(9)   |
| C(38) | 120(14) | 106(6)  | 129(9)  | 50(6) | 9(10)  | -5(9)   |
| C(39) | 109(13) | 98(6)   | 130(10) | 46(6) | 17(9)  | -9(8)   |
| C(40) | 129(14) | 112(8)  | 125(8)  | 49(7) | 29(10) | 33(9)   |
| C(41) | 147(15) | 115(6)  | 120(11) | 53(7) | 48(10) | 41(10)  |
| C(42) | 163(16) | 108(6)  | 127(12) | 57(8) | 35(11) | 14(10)  |
| C(43) | 153(17) | 104(6)  | 160(15) | 58(8) | 48(12) | 40(10)  |
| C(44) | 200(20) | 104(7)  | 134(14) | 32(9) | 46(12) | -14(11) |
| C(45) | 126(14) | 103(7)  | 148(13) | 55(8) | 41(10) | 33(9)   |
| C(46) | 169(18) | 102(7)  | 125(13) | 32(9) | 34(11) | -2(10)  |
| C(47) | 134(15) | 104(9)  | 134(11) | 52(8) | 12(10) | -4(9)   |
| C(48) | 180(18) | 121(11) | 136(11) | 60(9) | 38(12) | 47(11)  |



|       |         |         |         |        |         |         |
|-------|---------|---------|---------|--------|---------|---------|
| C(49) | 132(15) | 109(8)  | 132(9)  | 53(7)  | 26(10)  | 36(9)   |
| C(50) | 143(15) | 113(9)  | 144(9)  | 61(7)  | 16(11)  | 34(9)   |
| C(51) | 97(12)  | 120(8)  | 146(10) | 62(8)  | 20(9)   | 18(8)   |
| C(52) | 139(14) | 93(7)   | 132(10) | 47(7)  | -9(10)  | 1(9)    |
| C(53) | 146(16) | 100(9)  | 148(10) | 51(7)  | 19(12)  | 11(9)   |
| C(54) | 138(14) | 106(8)  | 150(9)  | 52(7)  | 63(9)   | 36(7)   |
| C(55) | 125(14) | 115(9)  | 150(9)  | 63(8)  | 43(10)  | 25(7)   |
| C(56) | 125(15) | 119(10) | 156(11) | 72(8)  | 35(10)  | 32(7)   |
| C(57) | 120(14) | 123(10) | 155(10) | 84(8)  | 13(10)  | 29(8)   |
| C(58) | 110(14) | 113(9)  | 151(10) | 70(7)  | 24(9)   | 32(7)   |
| C(59) | 123(15) | 123(10) | 156(10) | 72(8)  | 30(10)  | 29(8)   |
| C(60) | 184(17) | 92(8)   | 150(10) | 48(8)  | 70(10)  | 29(7)   |
| C(61) | 173(18) | 127(12) | 158(11) | 55(10) | 45(11)  | 43(11)  |
| C(62) | 116(15) | 122(11) | 171(13) | 54(10) | 48(12)  | 2(9)    |
| C(63) | 142(16) | 98(9)   | 157(12) | 39(9)  | 32(12)  | 7(9)    |
| C(64) | 76(11)  | 99(8)   | 139(11) | 25(7)  | 17(9)   | -6(7)   |
| C(65) | 175(18) | 93(9)   | 125(11) | 15(8)  | 27(11)  | -19(8)  |
| C(66) | 139(16) | 104(10) | 142(12) | 26(8)  | 36(11)  | 2(8)    |
| C(67) | 175(17) | 84(8)   | 140(12) | 28(8)  | 33(11)  | 13(8)   |
| C(68) | 166(15) | 107(9)  | 140(13) | 35(9)  | 33(11)  | 11(10)  |
| C(69) | 190(16) | 140(14) | 191(19) | 51(13) | 62(15)  | 75(14)  |
| C(70) | 164(17) | 103(11) | 300(30) | 30(15) | 102(18) | -12(10) |
| C(71) | 143(15) | 94(7)   | 147(12) | 49(7)  | 33(9)   | 24(8)   |
| C(72) | 121(13) | 81(6)   | 127(10) | 33(6)  | 48(8)   | 30(7)   |
| C(73) | 143(15) | 110(7)  | 131(11) | 40(8)  | 42(8)   | 44(9)   |
| C(74) | 157(16) | 111(7)  | 116(11) | 43(7)  | 26(9)   | 7(9)    |
| C(75) | 151(15) | 97(7)   | 139(11) | 46(7)  | 52(9)   | 11(7)   |
| C(76) | 162(16) | 87(6)   | 144(12) | 55(7)  | 48(8)   | 33(8)   |
| C(77) | 188(18) | 83(7)   | 154(14) | 25(7)  | 60(12)  | 49(9)   |
| C(78) | 160(16) | 99(7)   | 179(15) | 27(8)  | 73(12)  | 17(8)   |
| C(79) | 169(16) | 111(11) | 220(20) | 55(13) | 67(15)  | 23(10)  |
| C(80) | 122(10) | 100(8)  | 114(10) | 51(6)  | 39(9)   | 25(8)   |
| C(81) | 220(20) | 108(7)  | 141(15) | 51(9)  | 46(10)  | 25(10)  |
| C(82) | 168(19) | 134(9)  | 172(17) | 53(10) | 78(10)  | 54(9)   |
| C(83) | 146(16) | 124(8)  | 173(13) | 70(8)  | 71(9)   | 37(8)   |
| C(84) | 134(16) | 97(7)   | 175(15) | 64(8)  | 55(9)   | 24(8)   |
| C(85) | 121(14) | 101(7)  | 194(15) | 24(9)  | 68(9)   | 36(8)   |
| C(86) | 160(17) | 128(9)  | 178(16) | 79(9)  | 57(10)  | 48(9)   |

|        |         |         |         |         |        |         |
|--------|---------|---------|---------|---------|--------|---------|
| C(87)  | 151(16) | 131(9)  | 159(12) | 75(8)   | 58(9)  | 20(9)   |
| C(88)  | 128(17) | 220(20) | 203(15) | 125(14) | 31(11) | 24(13)  |
| C(89)  | 112(14) | 148(13) | 179(16) | 79(11)  | 52(11) | 19(9)   |
| C(90)  | 122(10) | 87(8)   | 146(12) | 58(6)   | 21(10) | 26(7)   |
| C(91)  | 260(30) | 127(10) | 197(19) | 78(11)  | 95(17) | 84(13)  |
| C(92)  | 125(15) | 125(10) | 177(13) | 67(9)   | 30(11) | 4(9)    |
| C(93)  | 122(13) | 95(8)   | 130(8)  | 45(6)   | 19(10) | 10(8)   |
| C(94)  | 155(17) | 97(8)   | 149(14) | 18(8)   | 46(11) | -21(9)  |
| C(95)  | 75(11)  | 73(7)   | 175(14) | 58(8)   | 25(8)  | 21(6)   |
| C(96)  | 129(15) | 95(8)   | 151(11) | 49(8)   | 36(9)  | 32(8)   |
| C(97)  | 118(13) | 71(7)   | 117(11) | 14(7)   | 18(8)  | 26(7)   |
| C(98)  | 140(15) | 77(8)   | 109(11) | 25(7)   | 18(8)  | 29(7)   |
| C(99)  | 109(12) | 79(7)   | 128(11) | 38(7)   | 19(8)  | 13(7)   |
| C(100) | 119(13) | 75(7)   | 153(13) | 40(8)   | 32(9)  | 18(7)   |
| C(101) | 118(14) | 105(10) | 147(13) | 52(9)   | 38(9)  | 31(9)   |
| C(102) | 145(16) | 109(8)  | 145(11) | 53(8)   | 39(8)  | 34(9)   |
| C(103) | 165(18) | 97(8)   | 207(17) | 51(9)   | 66(13) | 26(9)   |
| C(104) | 102(13) | 91(9)   | 164(10) | 28(9)   | 17(10) | 10(7)   |
| C(105) | 175(16) | 87(9)   | 141(9)  | 52(8)   | 2(9)   | 6(8)    |
| C(106) | 121(14) | 99(9)   | 146(9)  | 40(9)   | -2(10) | 2(8)    |
| C(107) | 165(15) | 140(11) | 168(9)  | 80(10)  | 24(10) | 23(9)   |
| C(108) | 152(19) | 159(15) | 141(9)  | 51(9)   | 28(10) | 68(10)  |
| C(109) | 146(18) | 133(13) | 148(9)  | 30(10)  | -9(12) | 33(9)   |
| C(110) | 196(12) | 216(12) | 167(8)  | 66(8)   | 44(8)  | 73(9)   |
| C(111) | 106(10) | 72(7)   | 111(10) | 28(7)   | 5(11)  | -4(7)   |
| C(112) | 123(10) | 83(7)   | 94(10)  | 18(7)   | 20(11) | 16(7)   |
| C(113) | 175(19) | 127(12) | 154(14) | 47(10)  | 46(13) | 5(10)   |
| C(114) | 238(19) | 147(16) | 182(18) | 79(15)  | 52(16) | 10(15)  |
| C(115) | 121(10) | 67(7)   | 125(11) | 32(7)   | 4(9)   | -5(9)   |
| C(116) | 130(11) | 87(9)   | 104(11) | 23(7)   | 4(9)   | -10(10) |
| C(117) | 201(18) | 107(11) | 154(9)  | 56(10)  | 24(13) | 25(11)  |
| C(118) | 280(20) | 230(20) | 190(20) | 123(19) | 28(19) | 100(20) |
| C(119) | 172(11) | 169(10) | 150(8)  | 52(8)   | 38(7)  | 15(8)   |
| C(120) | 179(17) | 121(12) | 162(16) | 56(11)  | 50(12) | 38(12)  |
| C(121) | 220(20) | 112(9)  | 170(16) | 44(10)  | 64(12) | 8(10)   |
| Cl(1)  | 130(4)  | 76(2)   | 133(3)  | 43(2)   | 29(3)  | 20(2)   |
| O(1S)  | 135(8)  | 95(6)   | 142(7)  | 39(5)   | 24(6)  | 20(5)   |
| O(2S)  | 159(9)  | 170(8)  | 178(9)  | 47(7)   | 73(7)  | 10(6)   |

|        |         |         |         |         |         |        |
|--------|---------|---------|---------|---------|---------|--------|
| O(3S)  | 173(9)  | 170(8)  | 210(9)  | 87(8)   | 32(7)   | 23(7)  |
| O(4S)  | 130(8)  | 120(6)  | 137(7)  | 49(5)   | 32(6)   | 29(6)  |
| Cl(2)  | 160(5)  | 100(3)  | 191(5)  | 76(3)   | 52(4)   | 41(3)  |
| O(5S)  | 188(9)  | 136(8)  | 186(9)  | 60(7)   | 56(7)   | 35(7)  |
| O(6S)  | 164(9)  | 139(7)  | 172(8)  | 66(7)   | 60(7)   | 42(6)  |
| O(7S)  | 139(8)  | 112(6)  | 147(7)  | 52(6)   | 48(6)   | 29(6)  |
| O(8S)  | 165(9)  | 140(7)  | 191(9)  | 76(7)   | 34(7)   | 35(7)  |
| Cl(3)  | 155(5)  | 115(3)  | 122(4)  | 43(3)   | 38(4)   | 29(3)  |
| O(9S)  | 162(19) | 155(17) | 163(18) | 64(14)  | 34(15)  | -4(14) |
| O(9')  | 160(18) | 127(15) | 175(18) | 57(13)  | 77(14)  | 54(13) |
| O(10S) | 134(16) | 117(14) | 123(15) | 17(13)  | 27(13)  | 12(12) |
| O(10') | 120(17) | 190(18) | 155(17) | 69(15)  | 46(14)  | 9(14)  |
| O(11S) | 120(20) | 123(16) | 115(18) | 49(13)  | 29(14)  | 27(13) |
| O(11') | 118(18) | 121(15) | 107(15) | 59(12)  | -7(12)  | 31(12) |
| O(12S) | 131(15) | 107(12) | 113(12) | 50(10)  | 14(11)  | 0(11)  |
| O(12') | 169(18) | 145(15) | 120(14) | 62(12)  | 27(12)  | 37(13) |
| Cl(4)  | 160(5)  | 103(3)  | 174(5)  | 39(3)   | 38(4)   | 38(3)  |
| O(13S) | 177(19) | 169(17) | 182(18) | 71(14)  | 35(15)  | 46(14) |
| O(14S) | 101(13) | 82(10)  | 120(13) | 36(8)   | 18(8)   | 23(7)  |
| O(15S) | 193(19) | 131(15) | 161(16) | 55(13)  | 29(14)  | 26(14) |
| O(16S) | 109(14) | 140(14) | 115(13) | 33(11)  | 24(11)  | 11(11) |
| O(17S) | 177(19) | 180(18) | 210(20) | 60(15)  | 67(16)  | 7(15)  |
| O(18S) | 144(17) | 152(15) | 195(18) | 50(13)  | 67(14)  | 51(13) |
| O(19S) | 250(30) | 250(30) | 250(30) | 87(15)  | 58(13)  | 53(12) |
| O(20S) | 240(20) | 250(20) | 230(20) | 104(18) | 33(18)  | 58(18) |
| Cl(5)  | 270(20) | 250(20) | 270(20) | 84(16)  | 72(17)  | 64(17) |
| O(21S) | 170(20) | 200(20) | 160(20) | 51(18)  | 48(18)  | 30(18) |
| O(22S) | 95(12)  | 99(11)  | 105(12) | 41(9)   | 13(9)   | 26(9)  |
| O(23S) | 190(20) | 190(20) | 190(20) | 62(11)  | 52(11)  | 42(11) |
| O(24S) | 90(17)  | 109(16) | 129(17) | 27(13)  | 50(14)  | -1(12) |
| Cl(6)  | 293(10) | 128(4)  | 190(6)  | 32(4)   | 62(6)   | 0(5)   |
| O(25S) | 269(14) | 272(14) | 253(13) | 77(9)   | 89(10)  | 31(9)  |
| O(26S) | 410(20) | 370(20) | 380(20) | 135(12) | 97(11)  | 91(11) |
| O(27S) | 430(30) | 440(30) | 440(30) | 134(13) | 122(13) | 94(12) |
| O(28S) | 200(11) | 204(10) | 212(10) | 52(8)   | 57(8)   | 24(8)  |
| N(1N)  | 190(18) | 182(15) | 175(16) | 89(13)  | 62(14)  | 15(12) |
| O(1N)  | 239(13) | 232(12) | 220(12) | 98(9)   | 71(9)   | 48(9)  |
| O(2N)  | 191(11) | 189(11) | 194(11) | 71(8)   | 50(9)   | 33(8)  |

|        |         |         |         |        |        |        |
|--------|---------|---------|---------|--------|--------|--------|
| C(1N)  | 243(18) | 240(18) | 234(18) | 91(11) | 58(11) | 55(11) |
| O(1WA) | 138(13) | 111(12) | 160(13) | 38(9)  | 30(9)  | 42(9)  |
| O(1WB) | 162(15) | 169(14) | 157(14) | 47(10) | 49(10) | 50(10) |
| O(1WC) | 121(13) | 114(12) | 132(12) | 47(9)  | 32(9)  | 39(9)  |
| O(2WA) | 206(19) | 204(18) | 201(18) | 76(11) | 44(11) | 56(11) |
| O(2WB) | 193(17) | 195(16) | 202(17) | 61(11) | 49(10) | 51(10) |
| O(2WC) | 215(18) | 216(17) | 207(17) | 76(11) | 57(10) | 47(10) |
| O(3W)  | 161(11) | 105(9)  | 135(10) | 54(8)  | 41(8)  | 42(8)  |

---

Table 5. Hydrogen coordinates ( $\times 10^4$ ) and isotropic displacement parameters ( $\text{\AA}^2 \times 10^{-3}$ ) for p-1.

|       | x     | y    | z     | U(eq) |
|-------|-------|------|-------|-------|
| H(1)  | 11388 | 9063 | 2243  | 147   |
| H(2)  | 9723  | 8313 | 3045  | 179   |
| H(3)  | 10943 | 8112 | 1480  | 163   |
| H(4)  | 9201  | 7410 | 2322  | 200   |
| H(9)  | 8769  | 5987 | -30   | 124   |
| H(11) | 8621  | 4212 | -137  | 118   |
| H(13) | 9672  | 5582 | 1372  | 128   |
| H(17) | 7138  | 5057 | -2065 | 123   |
| H(18) | 8119  | 3539 | -1947 | 149   |
| H(19) | 6823  | 4651 | -3048 | 128   |
| H(20) | 7903  | 3188 | -2924 | 150   |
| H(25) | 8639  | 2848 | 861   | 147   |
| H(26) | 11088 | 4155 | 2027  | 149   |
| H(27) | 11637 | 3412 | 2409  | 168   |
| H(28) | 9111  | 2152 | 1312  | 149   |
| H(29) | 3415  | 4080 | -3296 | 127   |
| H(30) | 4518  | 2631 | -2996 | 136   |
| H(31) | 4120  | 4656 | -2357 | 146   |
| H(32) | 5173  | 3189 | -2038 | 146   |
| H(37) | 6046  | 5823 | -415  | 145   |
| H(39) | 7037  | 5715 | 1140  | 140   |
| H(44) | 6128  | 7483 | 1786  | 186   |
| H(45) | 7638  | 8108 | 784   | 146   |
| H(46) | 7676  | 9101 | 1330  | 166   |
| H(50) | 7821  | 4683 | 2321  | 159   |
| H(51) | 6464  | 3058 | 1035  | 144   |
| H(52) | 8070  | 4168 | 2914  | 155   |
| H(53) | 6777  | 2573 | 1692  | 161   |
| H(55) | 10632 | 1079 | 2678  | 150   |
| H(56) | 11482 | 1640 | 1396  | 153   |
| H(57) | 12624 | 2554 | 2093  | 153   |
| H(58) | 11756 | 2010 | 3350  | 144   |

|        |       |      |       |     |
|--------|-------|------|-------|-----|
| H(60)  | 9641  | 615  | 1723  | 164 |
| H(61A) | 9303  | 301  | 731   | 225 |
| H(61B) | 10378 | 767  | 796   | 225 |
| H(61C) | 9419  | 1031 | 1001  | 225 |
| H(63)  | 2667  | 1564 | -4795 | 164 |
| H(64)  | 2369  | 2245 | -5241 | 136 |
| H(65)  | 1769  | 2560 | -3436 | 173 |
| H(66)  | 1395  | 3301 | -3895 | 163 |
| H(68)  | 2043  | 3727 | -4624 | 172 |
| H(69A) | 462   | 3685 | -5269 | 254 |
| H(69B) | 205   | 3418 | -4795 | 254 |
| H(69C) | 115   | 2955 | -5416 | 254 |
| H(70A) | 10342 | 5023 | -3783 | 297 |
| H(70B) | 10018 | 5677 | -3655 | 297 |
| H(70C) | 9540  | 5155 | -4269 | 297 |
| H(71)  | 6806  | 3171 | -5148 | 153 |
| H(73)  | 9022  | 3004 | -3803 | 151 |
| H(74)  | 9496  | 4079 | -3340 | 157 |
| H(76)  | 7235  | 4266 | -4656 | 151 |
| H(77A) | 7149  | 2193 | -5190 | 212 |
| H(77B) | 7409  | 2124 | -4578 | 212 |
| H(77C) | 8325  | 2159 | -4898 | 212 |
| H(78)  | 9120  | 5090 | -3264 | 177 |
| H(79A) | 7362  | 5171 | -3684 | 247 |
| H(79B) | 7732  | 5248 | -4218 | 247 |
| H(79C) | 8215  | 5775 | -3606 | 247 |
| H(82)  | 6471  | 3908 | 3331  | 181 |
| H(84)  | 6800  | 1918 | 3375  | 155 |
| H(85)  | 7904  | 2785 | 3989  | 167 |
| H(86)  | 5223  | 2982 | 2607  | 174 |
| H(87)  | 5759  | 1495 | 2348  | 167 |
| H(88A) | 5163  | 2120 | 1788  | 262 |
| H(88B) | 4118  | 2132 | 2012  | 262 |
| H(88C) | 4273  | 1497 | 1604  | 262 |
| H(89A) | 4044  | 981  | 2335  | 210 |
| H(89B) | 3890  | 1609 | 2756  | 210 |
| H(89C) | 4779  | 1274 | 2974  | 210 |
| H(91A) | 10198 | -278 | 1199  | 268 |

|        |       |       |       |     |
|--------|-------|-------|-------|-----|
| H(91B) | 10898 | 13    | 1845  | 268 |
| H(91C) | 11371 | 138   | 1355  | 268 |
| H(92A) | 13045 | 2948  | 3635  | 215 |
| H(92B) | 12812 | 3291  | 3185  | 215 |
| H(92C) | 13823 | 2986  | 3239  | 215 |
| H(93)  | 6154  | 4161  | -222  | 142 |
| H(94)  | 6094  | 8526  | 2283  | 173 |
| H(95)  | 12001 | 8930  | 3918  | 126 |
| H(97)  | 10985 | 10529 | 4377  | 129 |
| H(98)  | 11804 | 10904 | 3801  | 135 |
| H(100) | 12927 | 9269  | 3323  | 140 |
| H(10A) | 12924 | 10803 | 3171  | 181 |
| H(10B) | 12695 | 10106 | 2745  | 181 |
| H(10C) | 13807 | 10404 | 3220  | 181 |
| H(102) | 10267 | 9674  | 4626  | 157 |
| H(10D) | 10125 | 8710  | 4706  | 232 |
| H(10E) | 11242 | 8645  | 4570  | 232 |
| H(10F) | 10240 | 8612  | 4079  | 232 |
| H(104) | 7451  | 10887 | 2143  | 152 |
| H(106) | 4941  | 9369  | 1580  | 157 |
| H(107) | 5063  | 9445  | 2489  | 187 |
| H(109) | 7453  | 11009 | 3111  | 185 |
| H(11A) | 6681  | 10632 | 3770  | 286 |
| H(11B) | 6421  | 9892  | 3534  | 286 |
| H(11C) | 5472  | 10249 | 3555  | 286 |
| H(11D) | 2319  | 1628  | -3391 | 232 |
| H(11E) | 3219  | 1496  | -3716 | 232 |
| H(11F) | 2034  | 1078  | -3989 | 232 |
| H(11G) | 7092  | 10270 | 669   | 282 |
| H(11H) | 7675  | 10127 | 1212  | 282 |
| H(11I) | 7364  | 10781 | 1289  | 282 |
| H(117) | 5932  | 9642  | 908   | 187 |
| H(11J) | 4544  | 10243 | 955   | 333 |
| H(11K) | 5141  | 10359 | 501   | 333 |
| H(11L) | 5418  | 10869 | 1121  | 333 |
| H(11M) | 11304 | 9631  | 5515  | 252 |
| H(11N) | 11837 | 10223 | 5396  | 252 |
| H(11O) | 12330 | 9623  | 5274  | 252 |

|        |      |      |       |     |
|--------|------|------|-------|-----|
| H(12A) | 2993 | 3248 | -5202 | 227 |
| H(12B) | 2222 | 3577 | -5522 | 227 |
| H(12C) | 1920 | 2844 | -5674 | 227 |
| H(12D) | 8561 | 3889 | 4447  | 253 |
| H(12E) | 7682 | 4291 | 4399  | 253 |
| H(12F) | 8393 | 4185 | 3958  | 253 |
| H(1N1) | 6476 | 8656 | 121   | 356 |
| H(1N2) | 6491 | 8379 | -528  | 356 |
| H(1N3) | 6208 | 9039 | -292  | 356 |

---
